# Supplementary material for: Efficient Synthesis of Fluorescent Coumarins and Phosphorous-Containing Coumarin-Type Heterocycles via Palladium Catalyzed Cross-Coupling Reactions
Source: MDPI journal article supplement (doi:10.3390/molecules27217649), 2022-11-07

## Supplementary Materials

### Efficient synthesis of fluorescent coumarins and phosphorous containing coumarin type heterocycles via palladium cross-coupling reactions.

#### List of content:

|                                                  |         |
|--------------------------------------------------|---------|
| 1. NMR spectra of compounds <b>3a-3e</b>         | S2-S11  |
| 2. NMR spectra of compounds <b>9a-9e</b>         | S12-S17 |
| 3. NMR spectra of compounds <b>10a-10e</b>       | S18-S23 |
| 4. NMR spectra of compounds <b>11a-11d</b>       | S24-S31 |
| 5. NMR spectra of compounds <b>12a, 12b, 12d</b> | S32-S36 |

$^1\text{H}$ ,  $^{13}\text{C}$  and  $^{31}\text{P}$  NMR spectra of compound **3a**

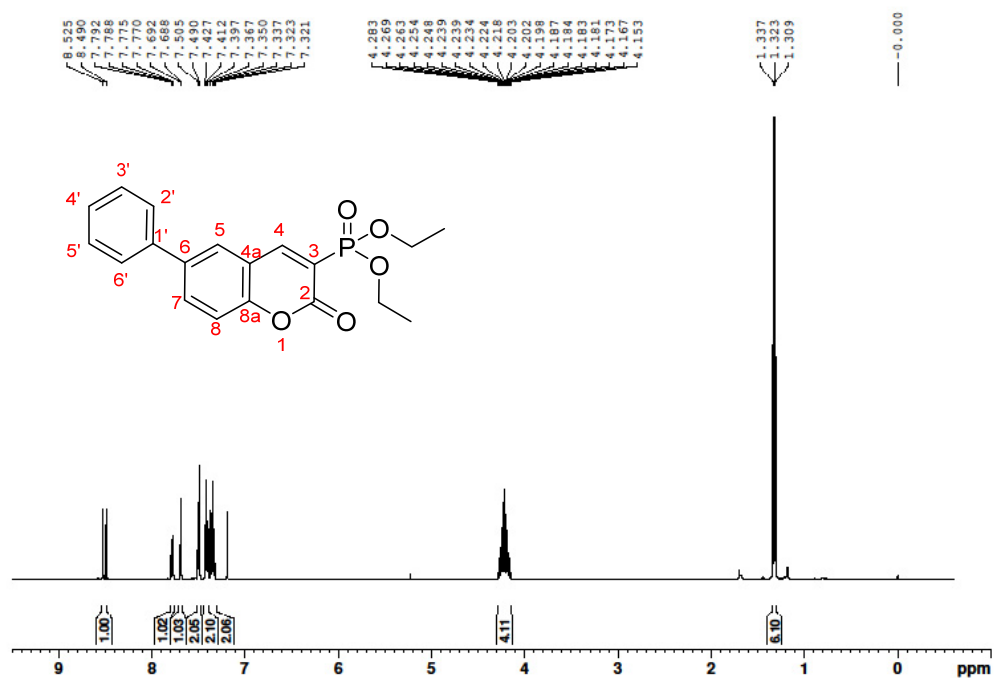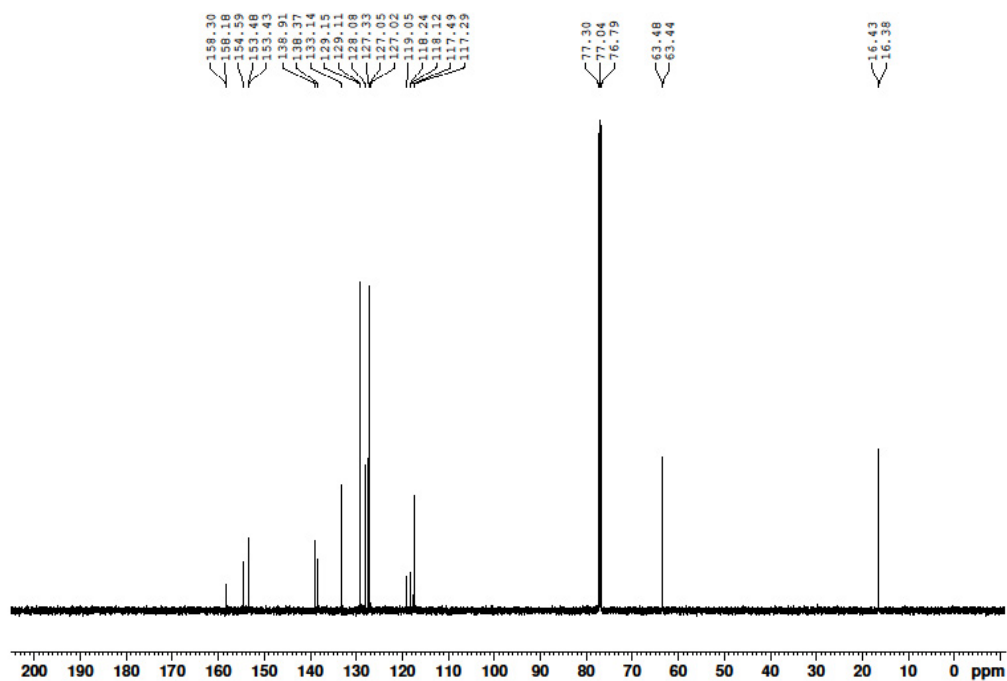

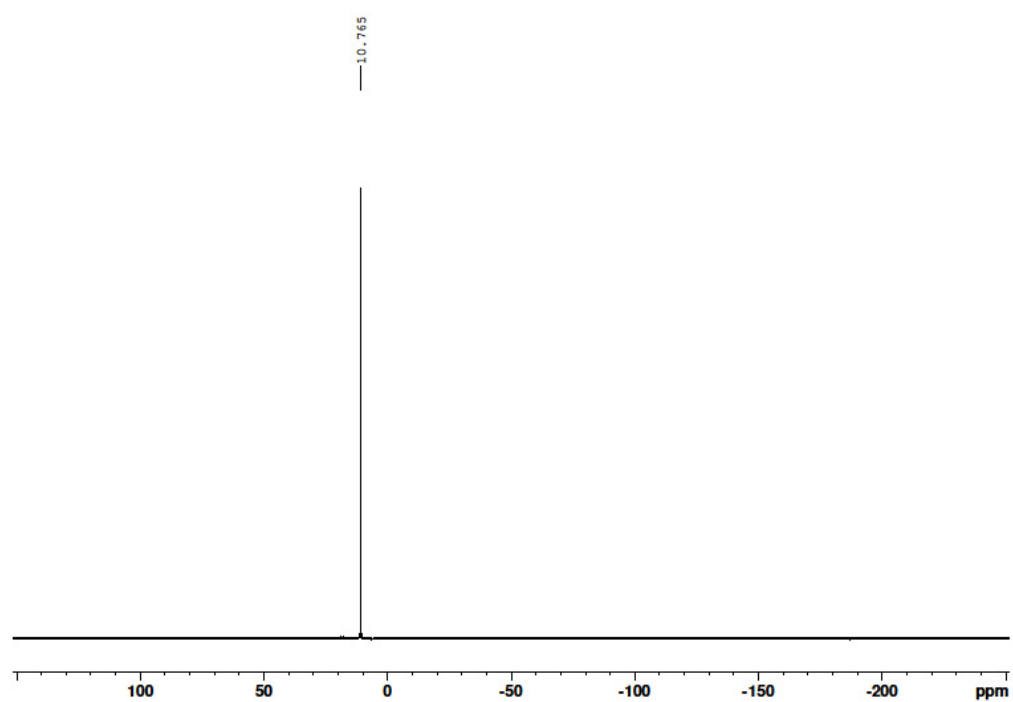

$^1\text{H}$ ,  $^{13}\text{C}$  and  $^{31}\text{P}$  NMR spectra of compound **3b**

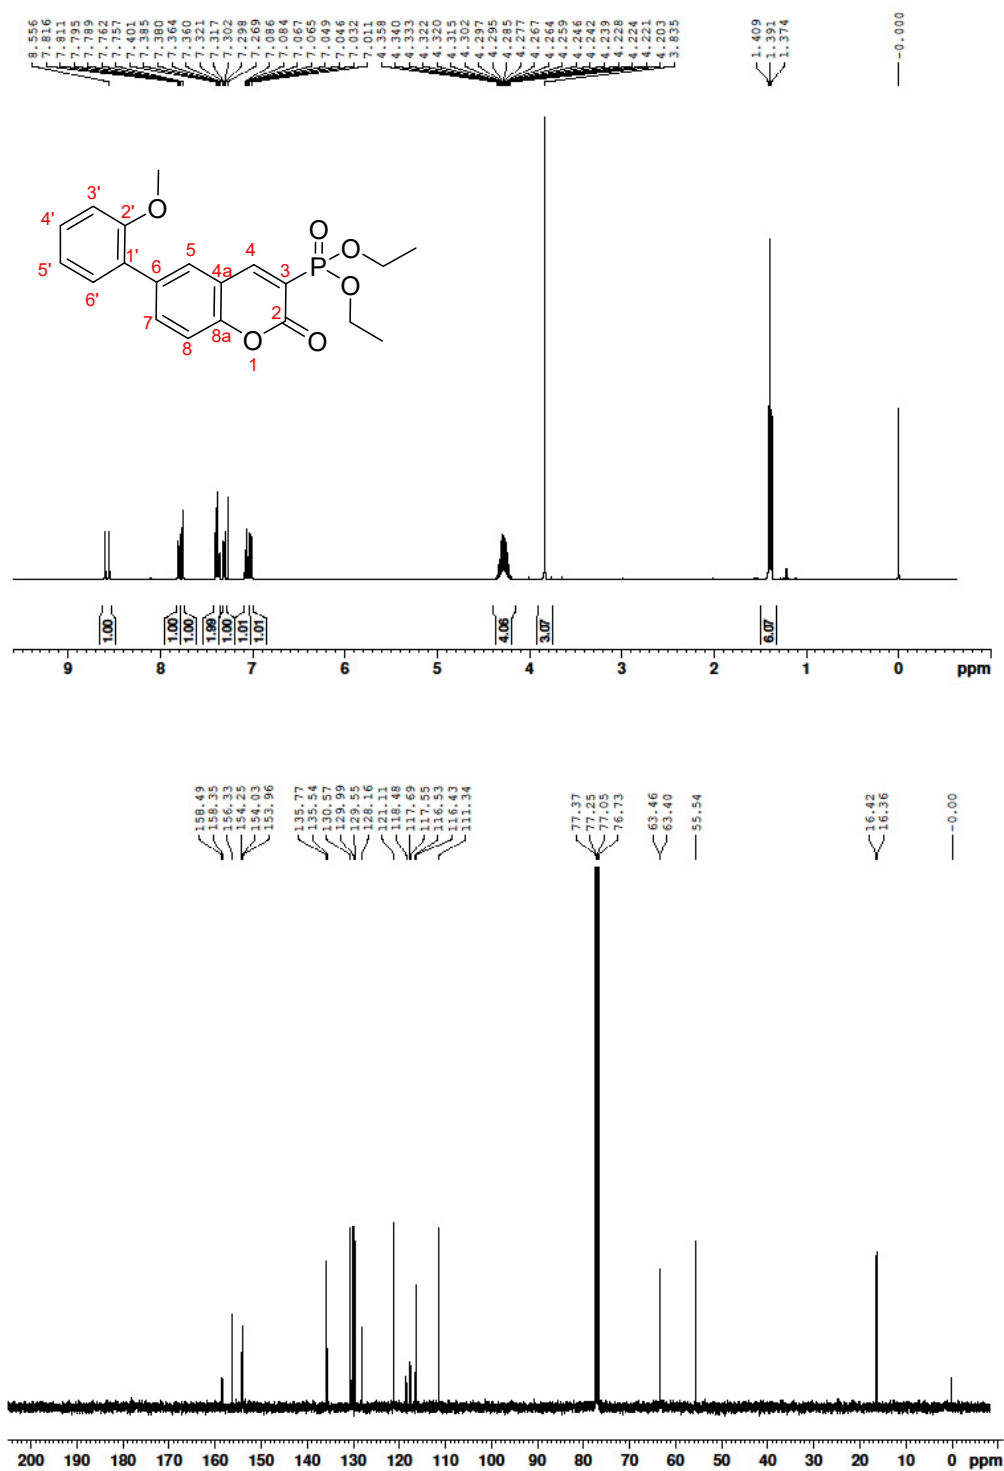

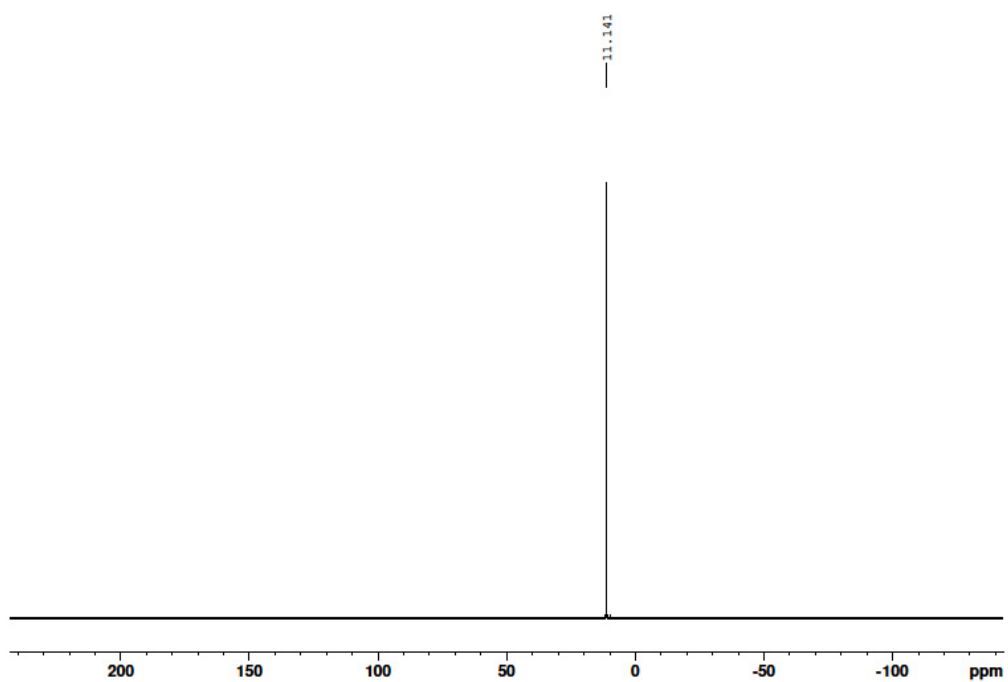

$^1\text{H}$ ,  $^{13}\text{C}$  and  $^{31}\text{P}$  NMR spectra of compound **3c**

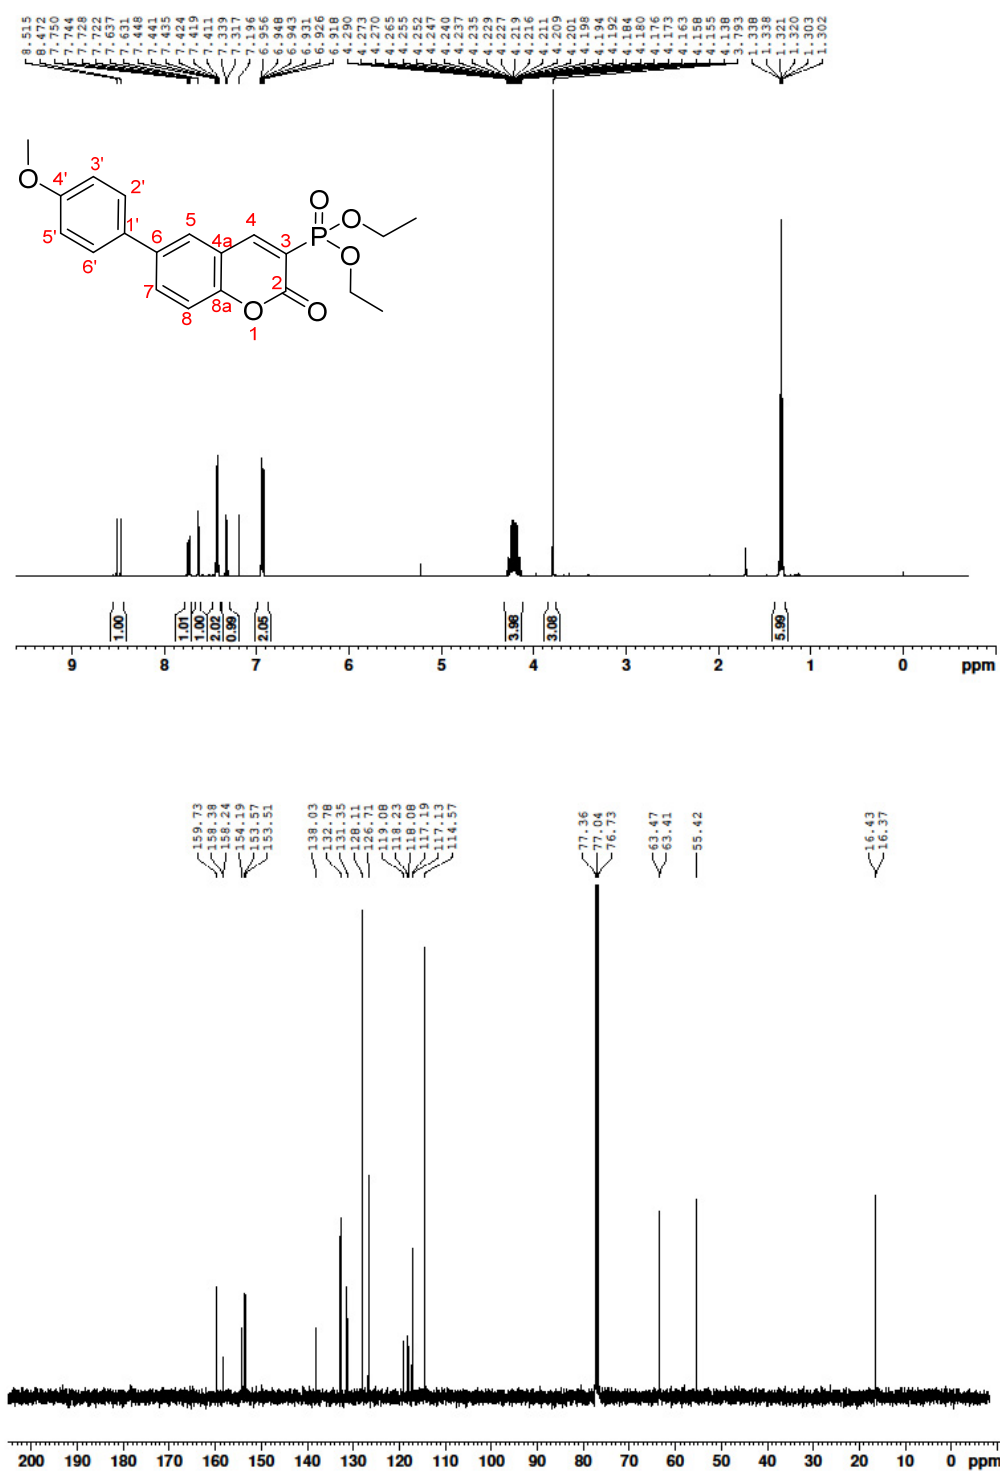

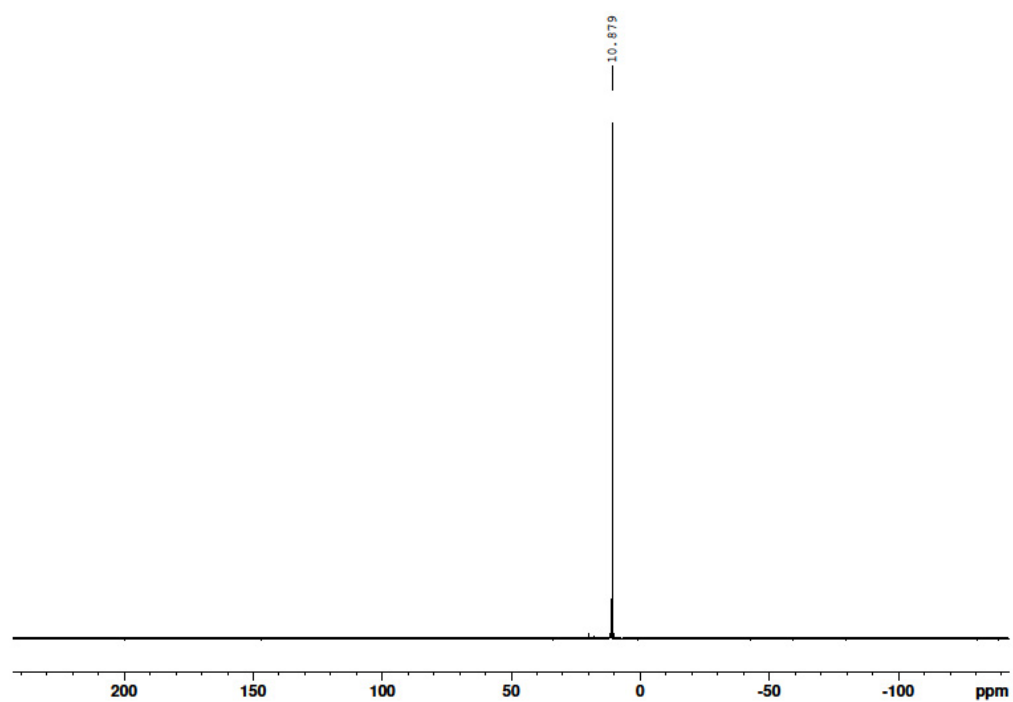

$^1\text{H}$ ,  $^{13}\text{C}$ ,  $^{19}\text{F}$  and  $^{31}\text{P}$  NMR spectra of compound **3d**

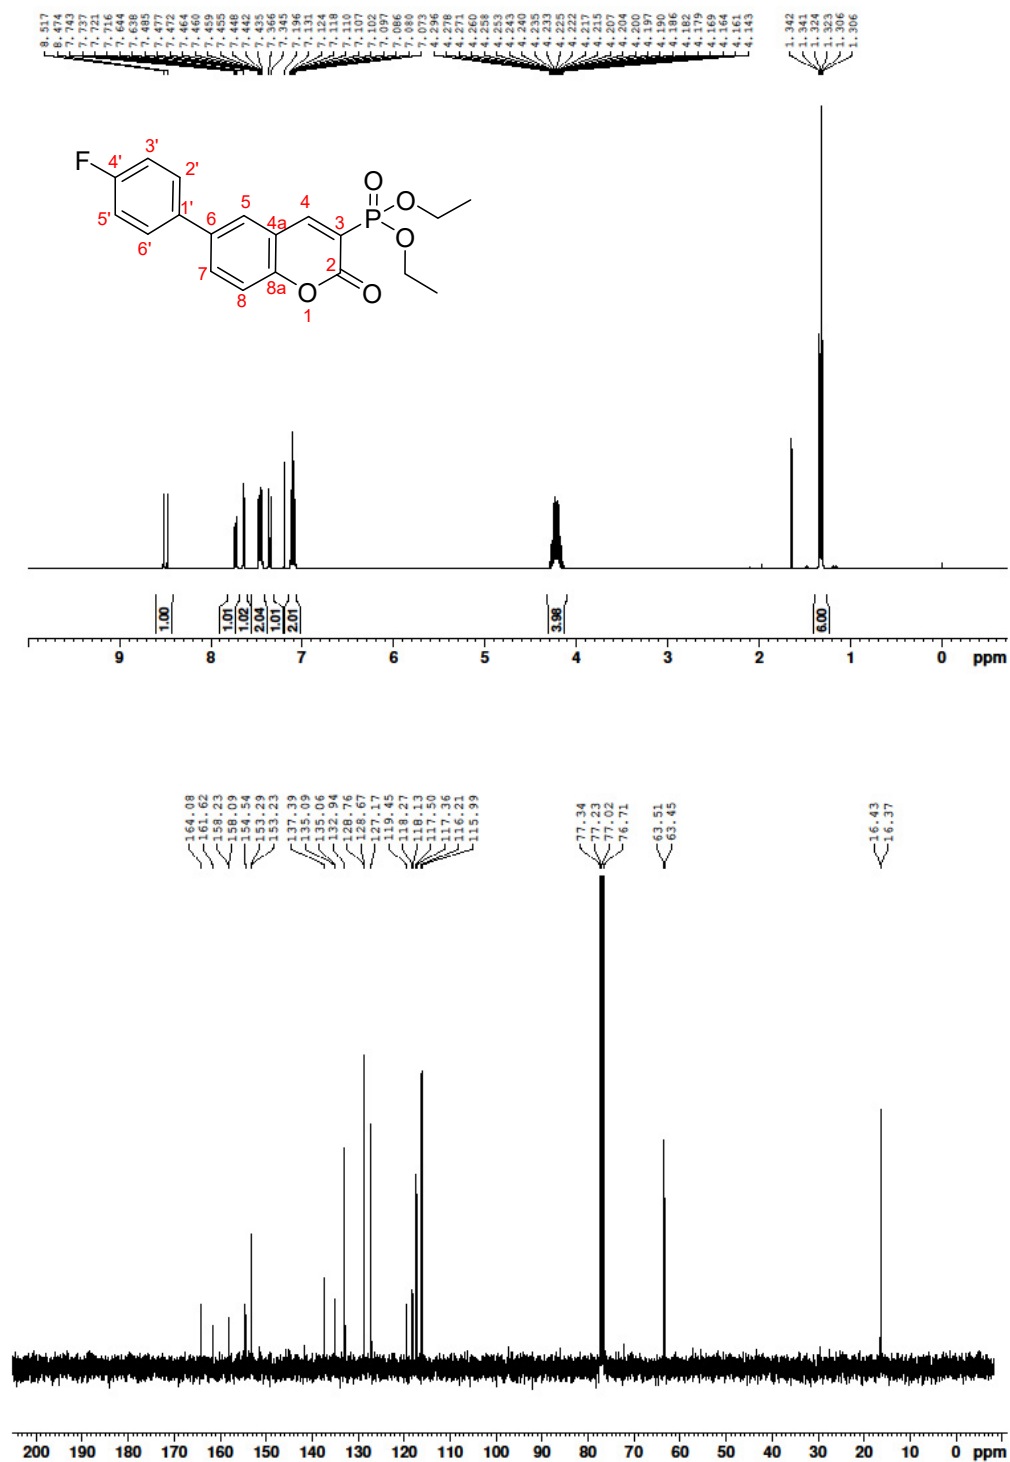



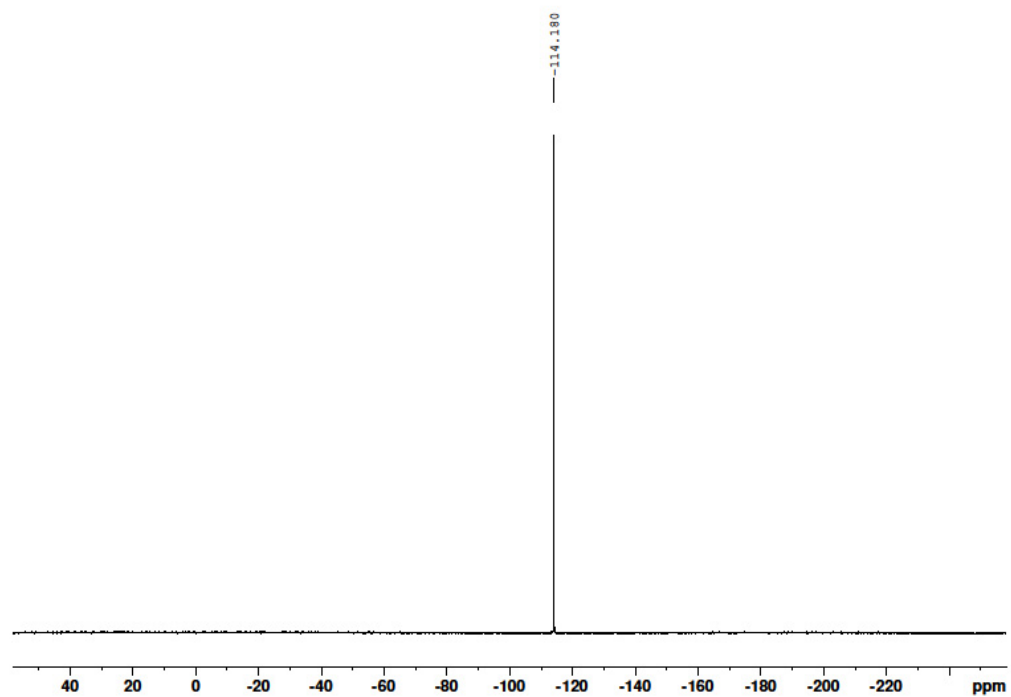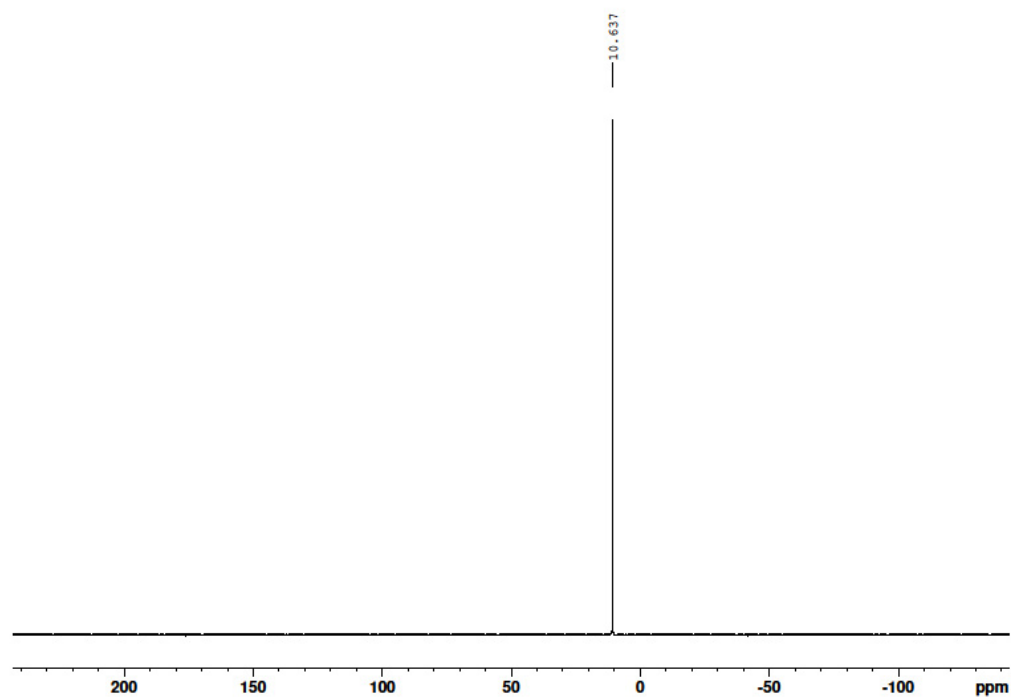

$^1\text{H}$ ,  $^{13}\text{C}$  and  $^{31}\text{P}$  NMR spectra of compound **3e**

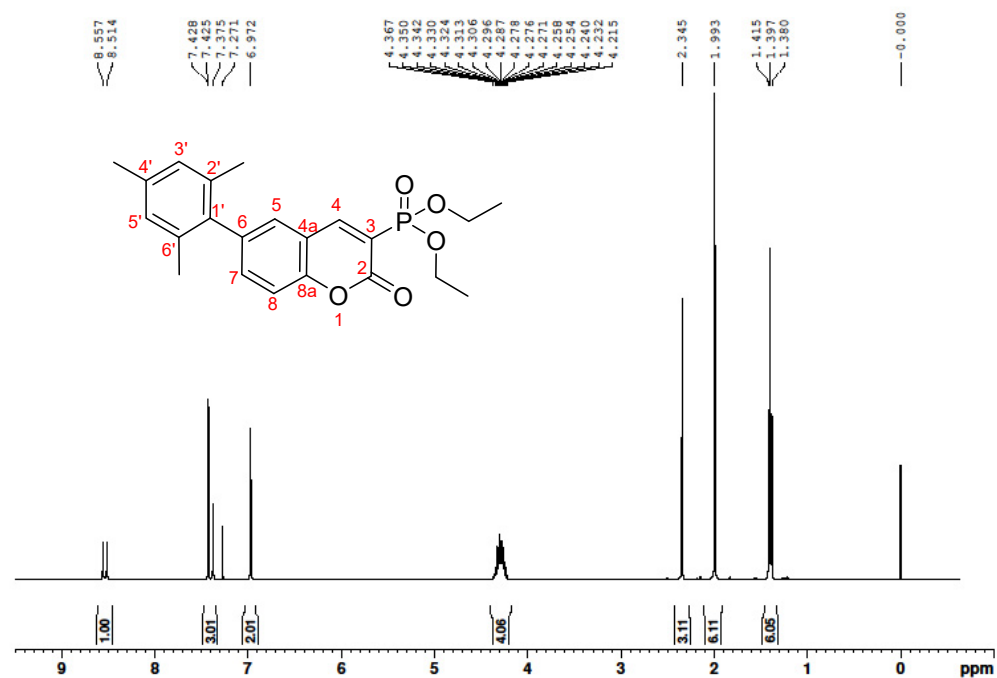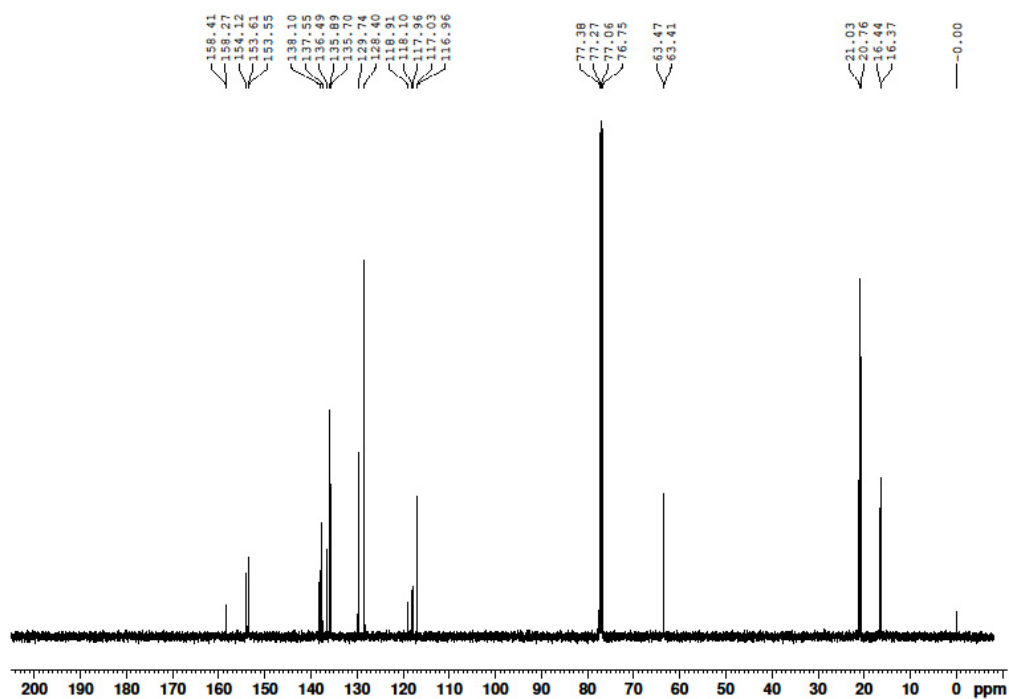

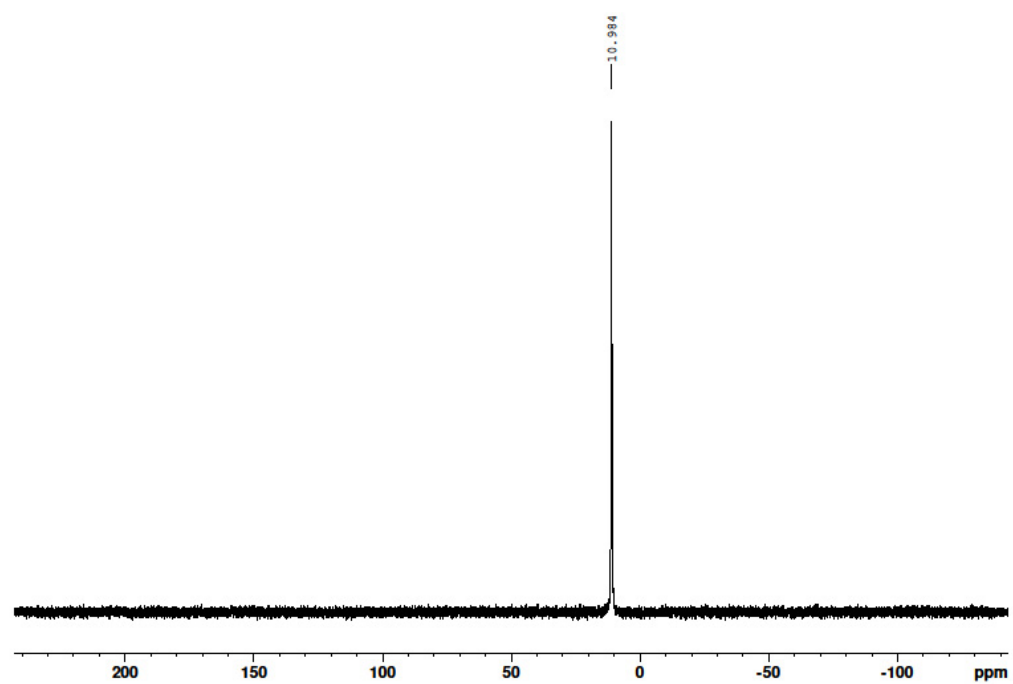

$^1\text{H}$  and  $^{13}\text{C}$  NMR spectra of compound **9a**

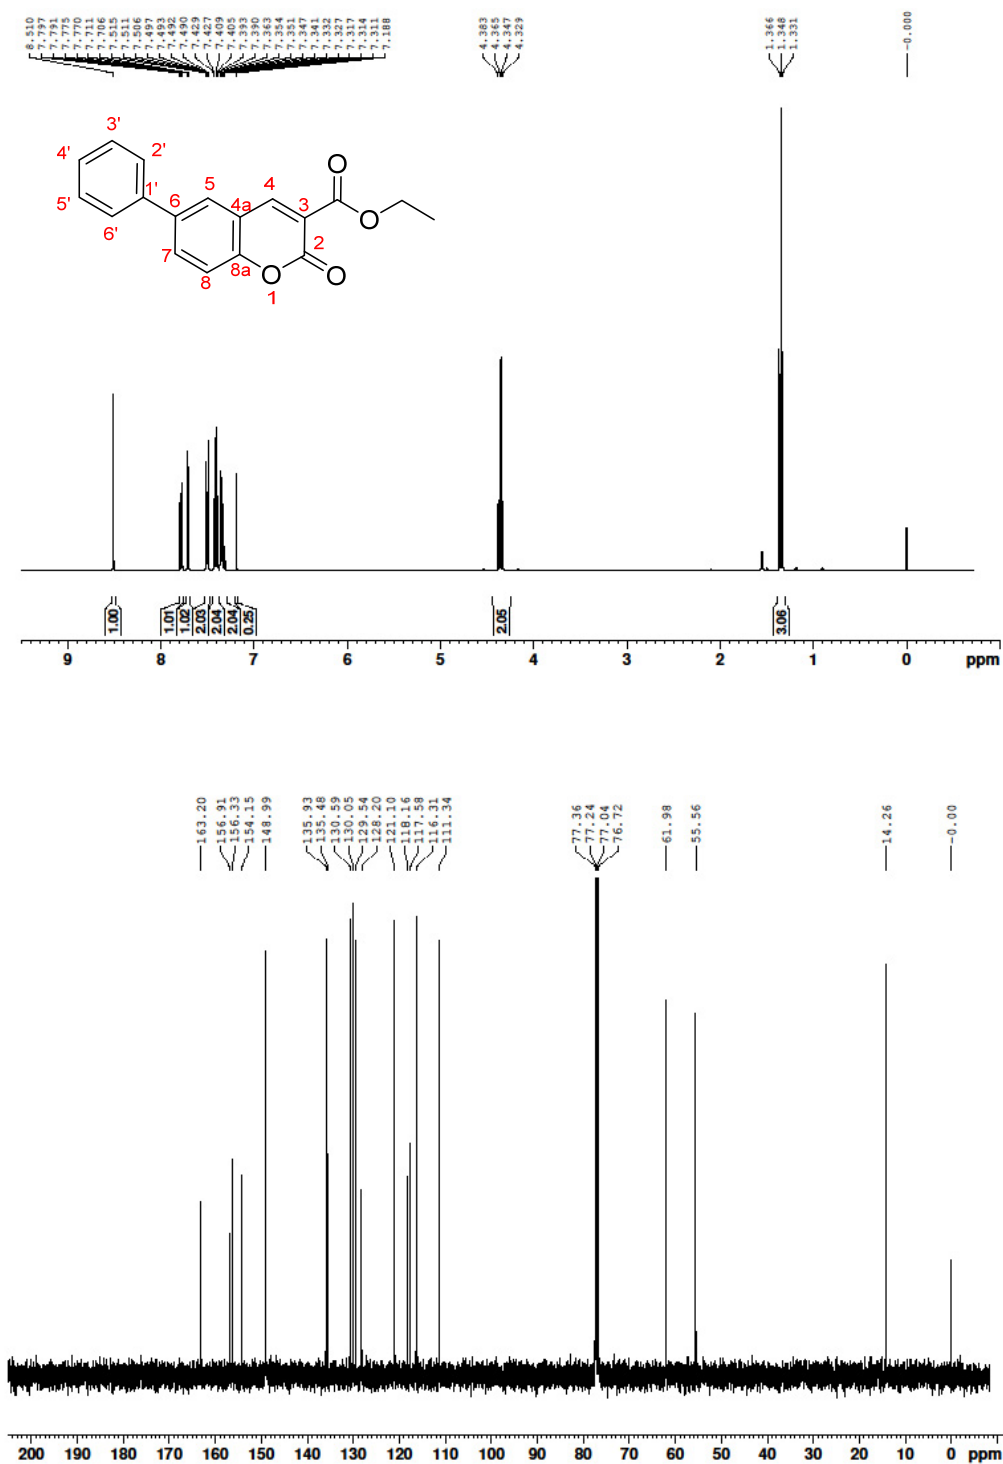

<sup>1</sup>H and <sup>13</sup>C NMR spectra of compound **9b**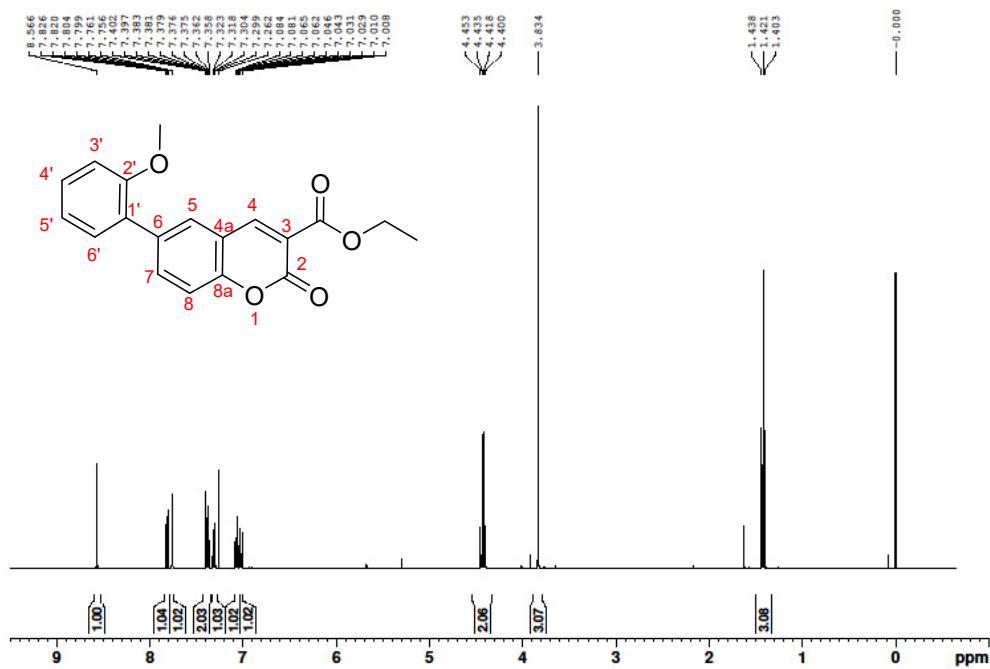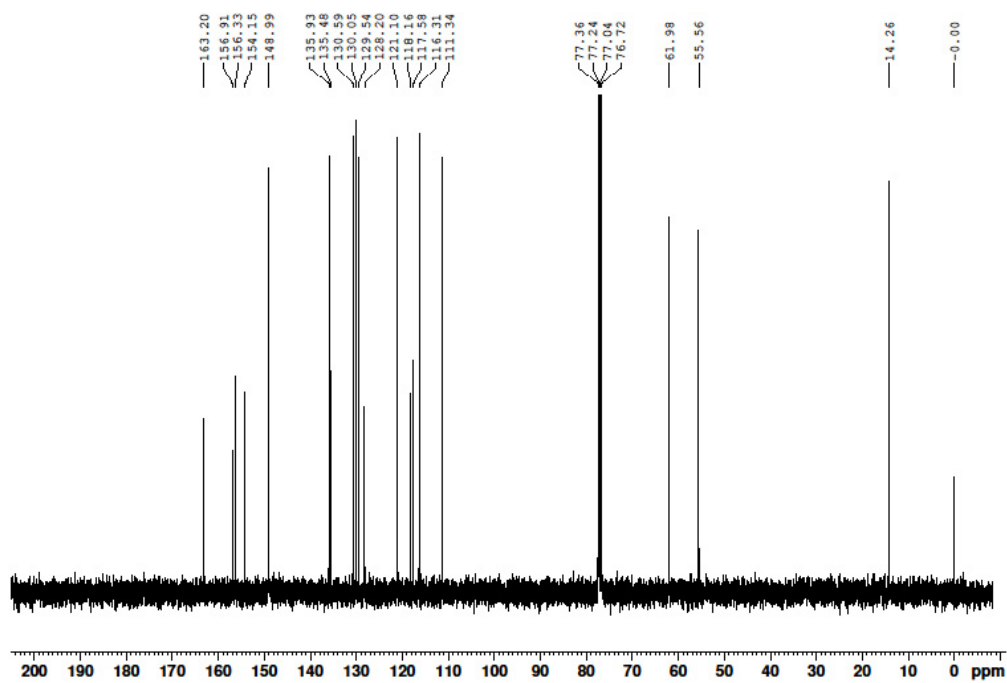

$^1\text{H}$  and  $^{13}\text{C}$  NMR spectra of compound **9c**

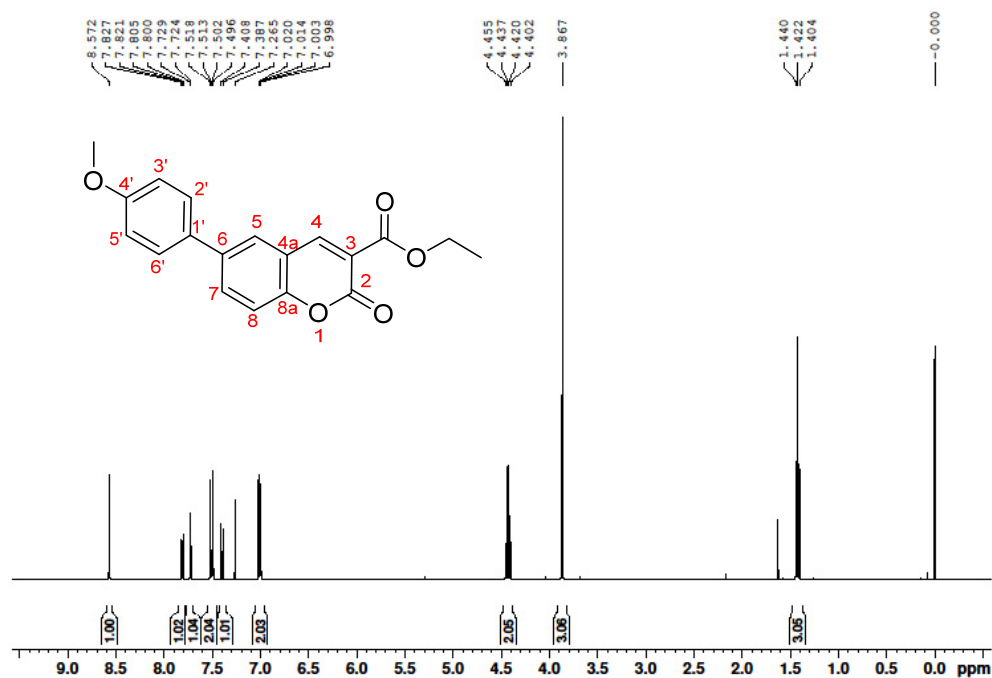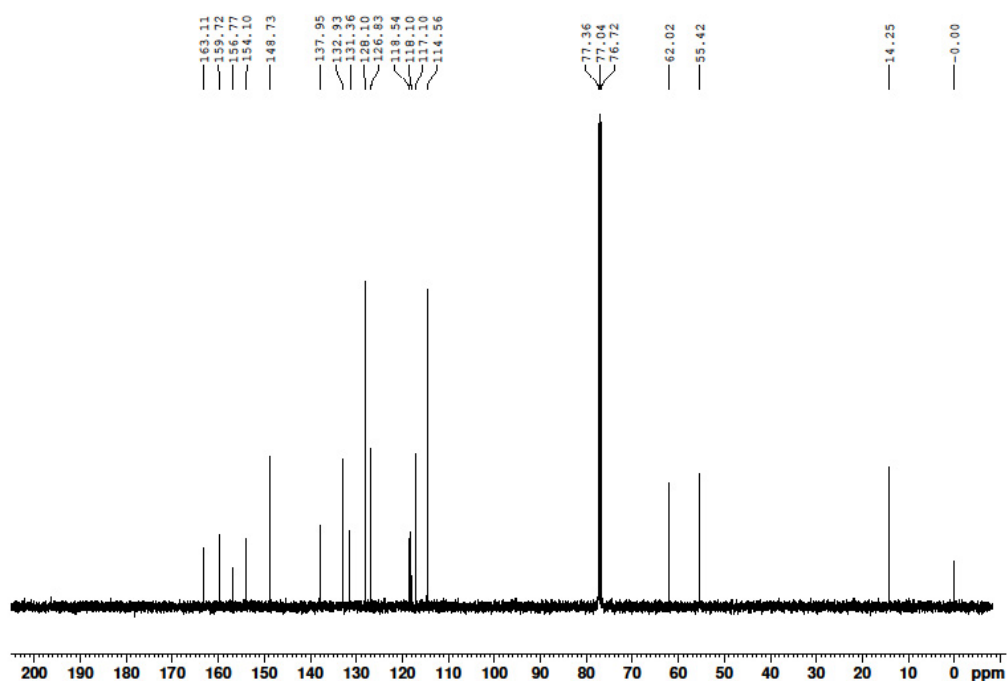

<sup>1</sup>H, <sup>13</sup>C and <sup>19</sup>F NMR spectra of compound **9d**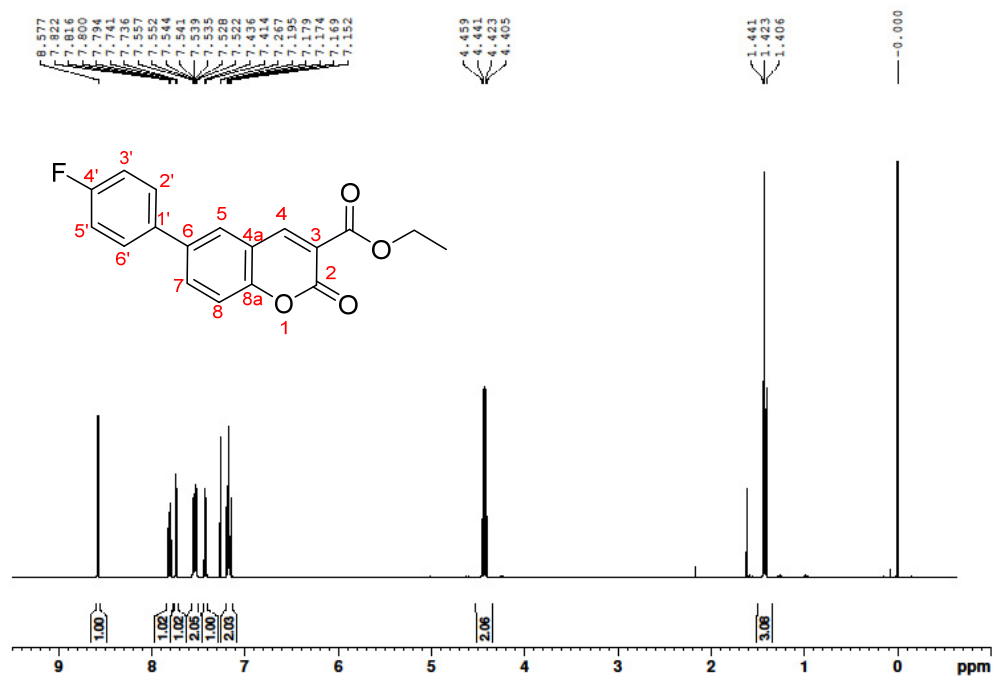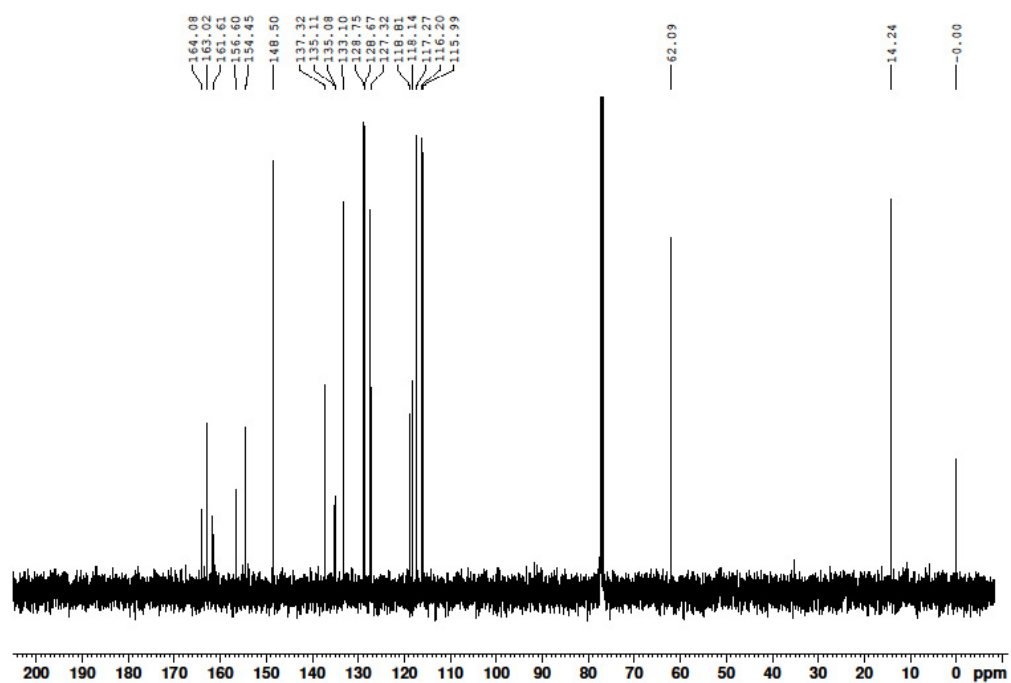

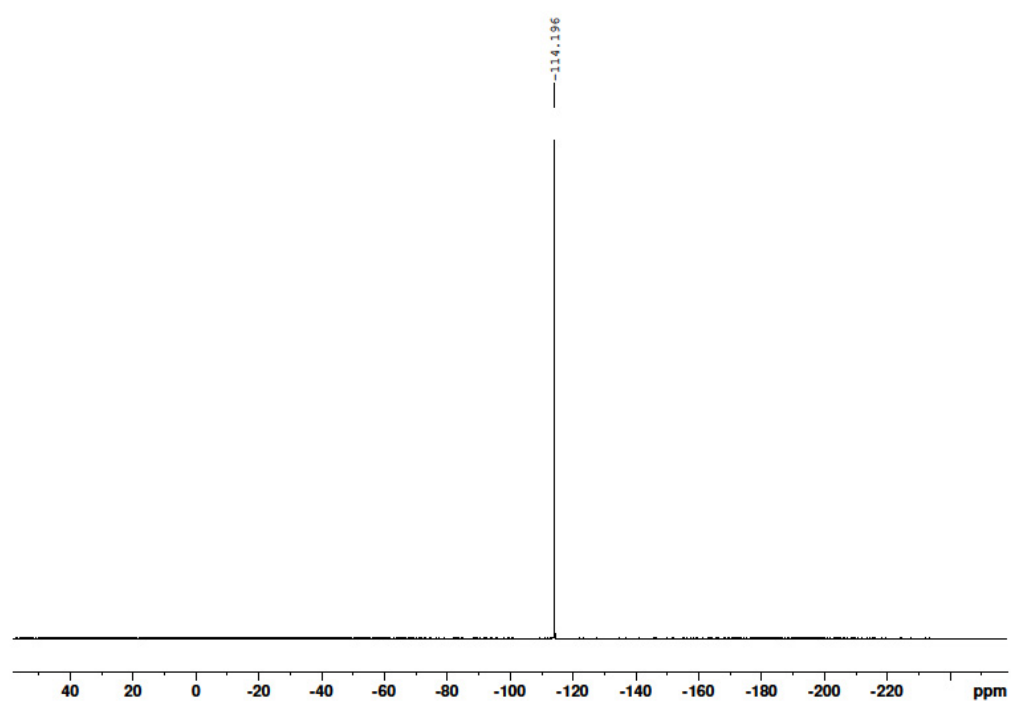



$^1\text{H}$  and  $^{13}\text{C}$  NMR spectra of compound **9e**

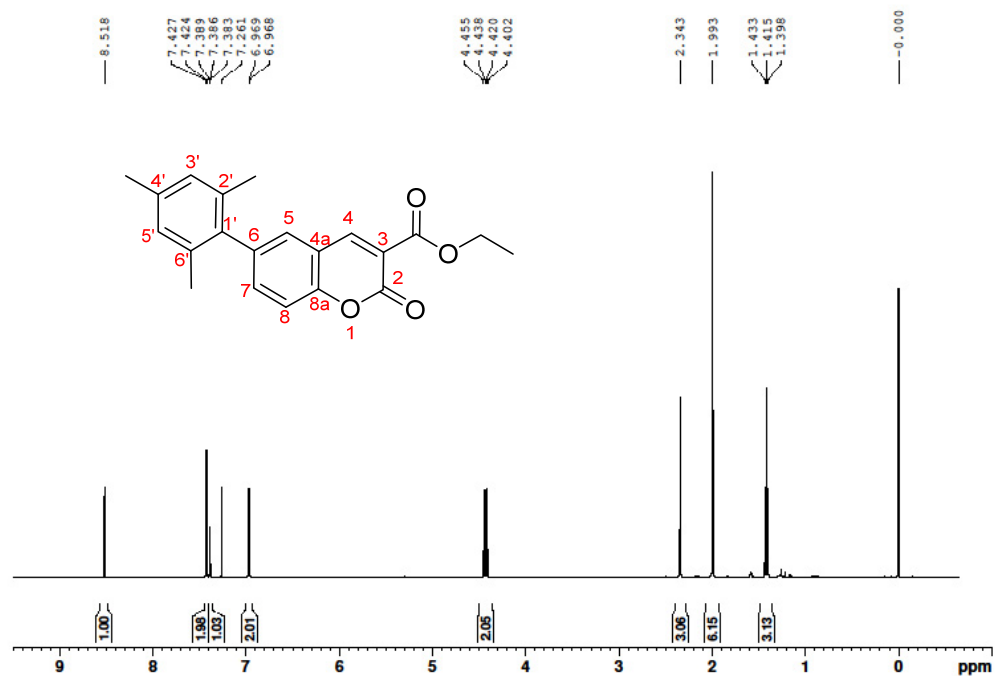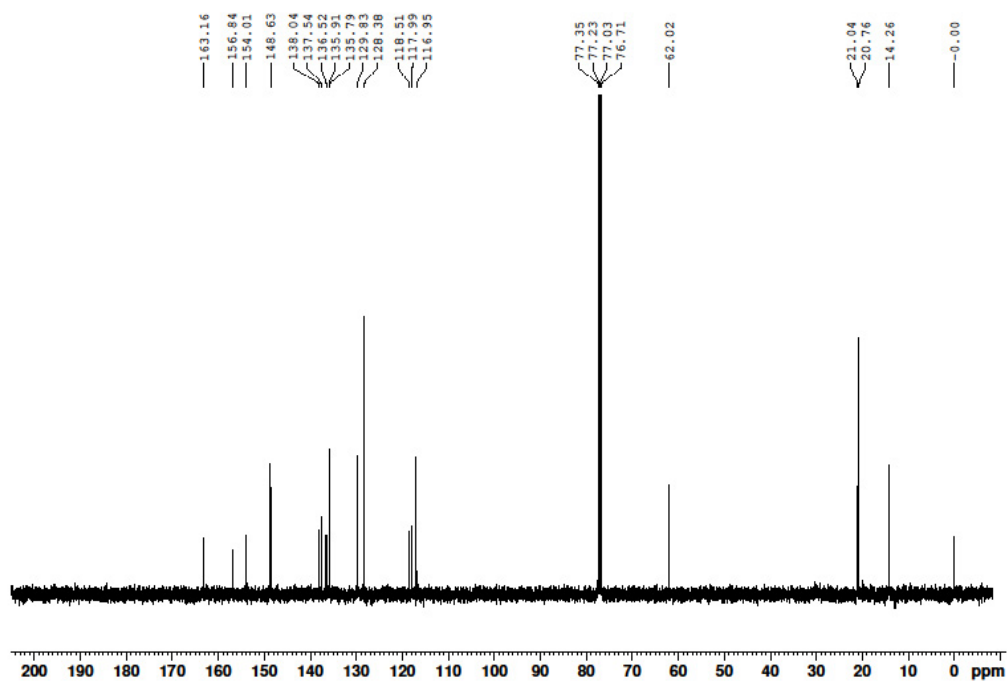

<sup>1</sup>H and <sup>13</sup>C NMR spectra of compound **10a**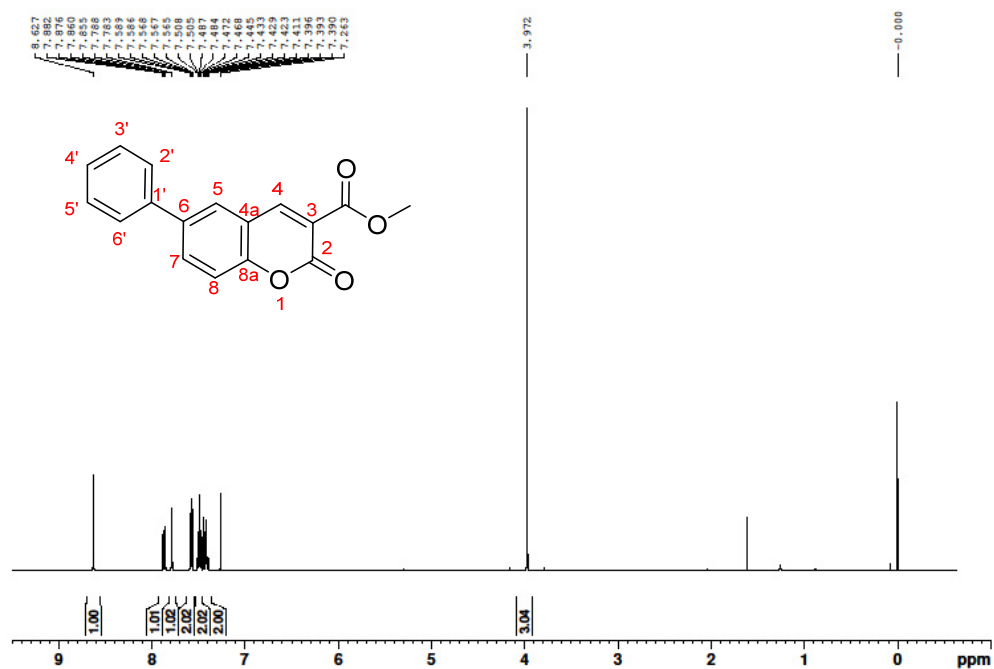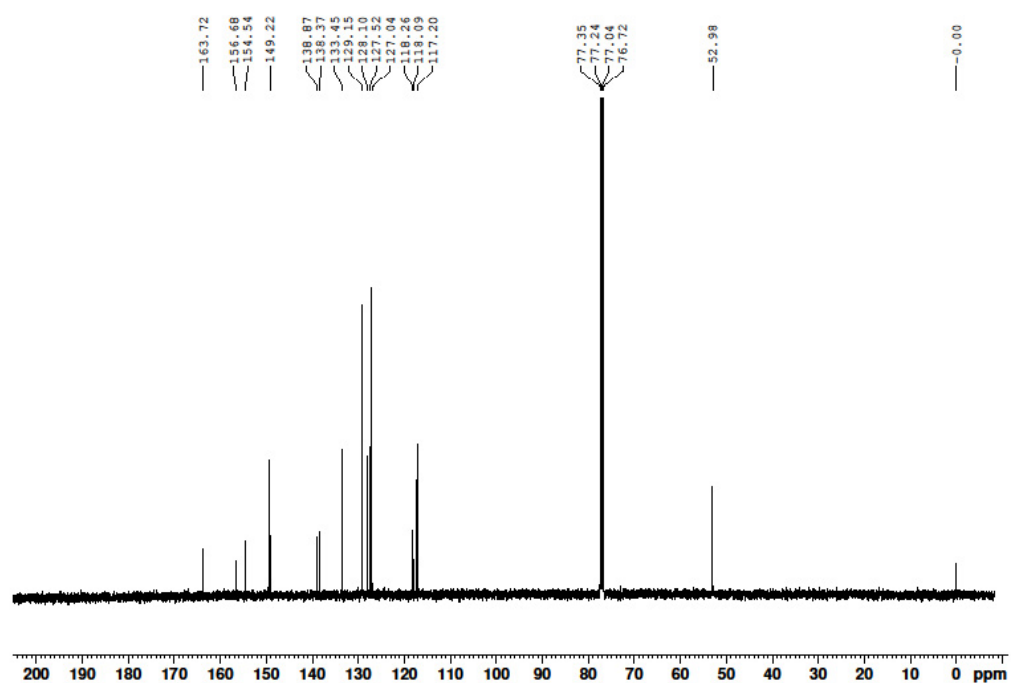

<sup>1</sup>H and <sup>13</sup>C NMR spectra of compound **10b**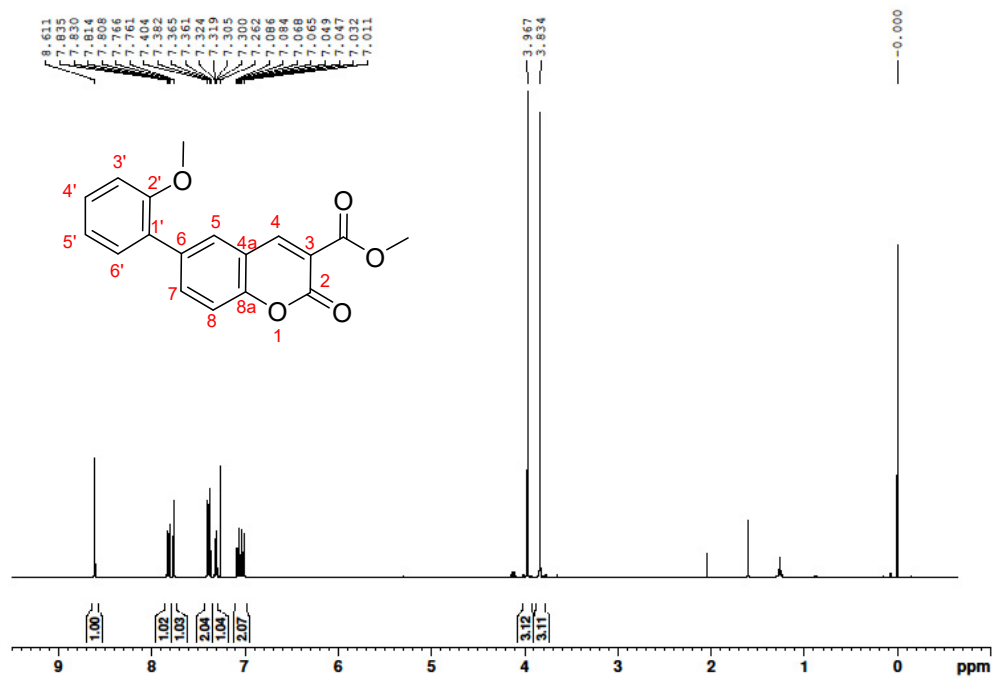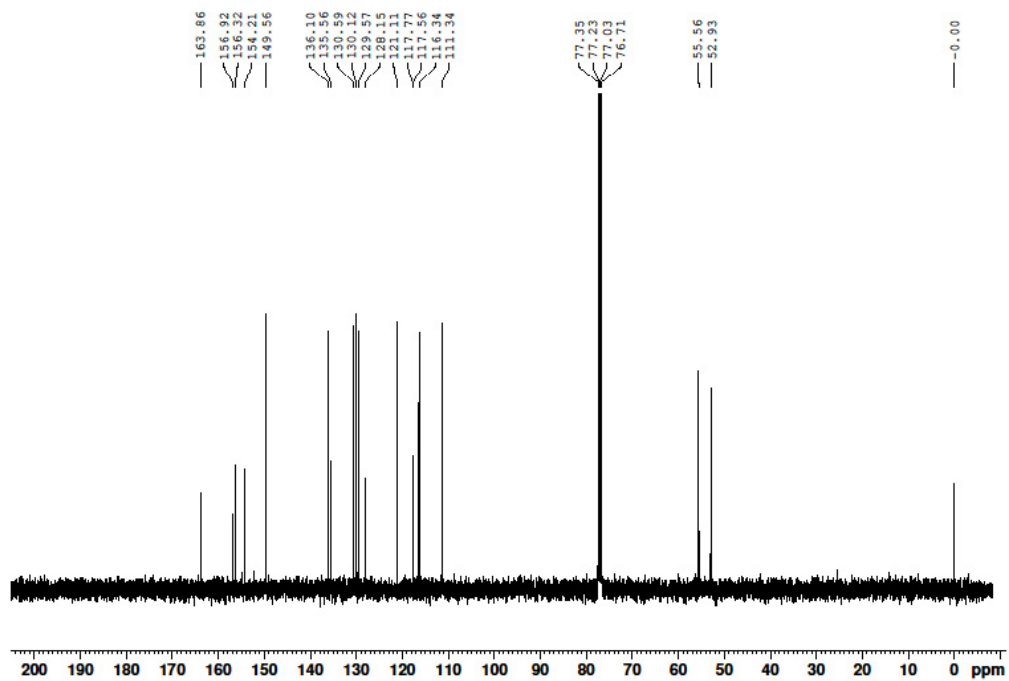

<sup>1</sup>H and <sup>13</sup>C NMR spectra of compound **10c**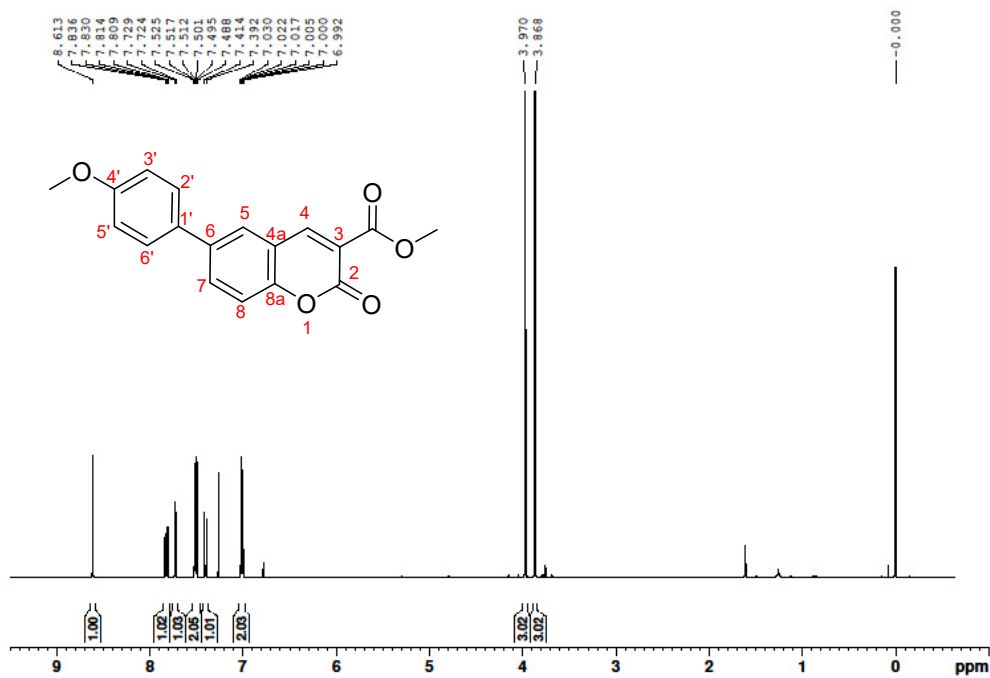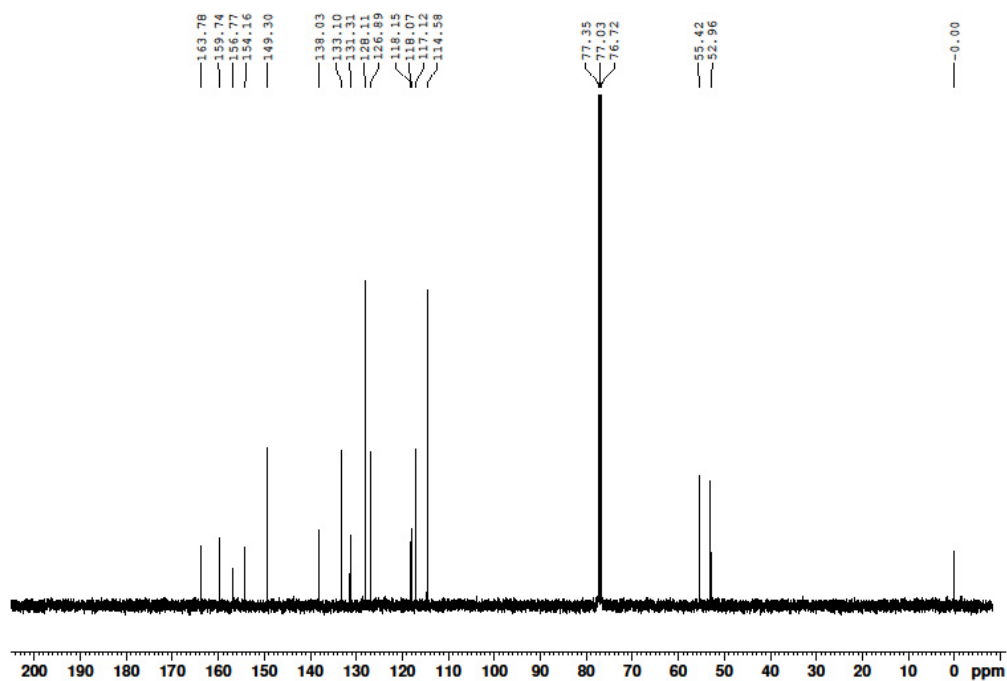

$^1\text{H}$ ,  $^{13}\text{C}$  and  $^{19}\text{F}$  NMR spectra of compound **10d**

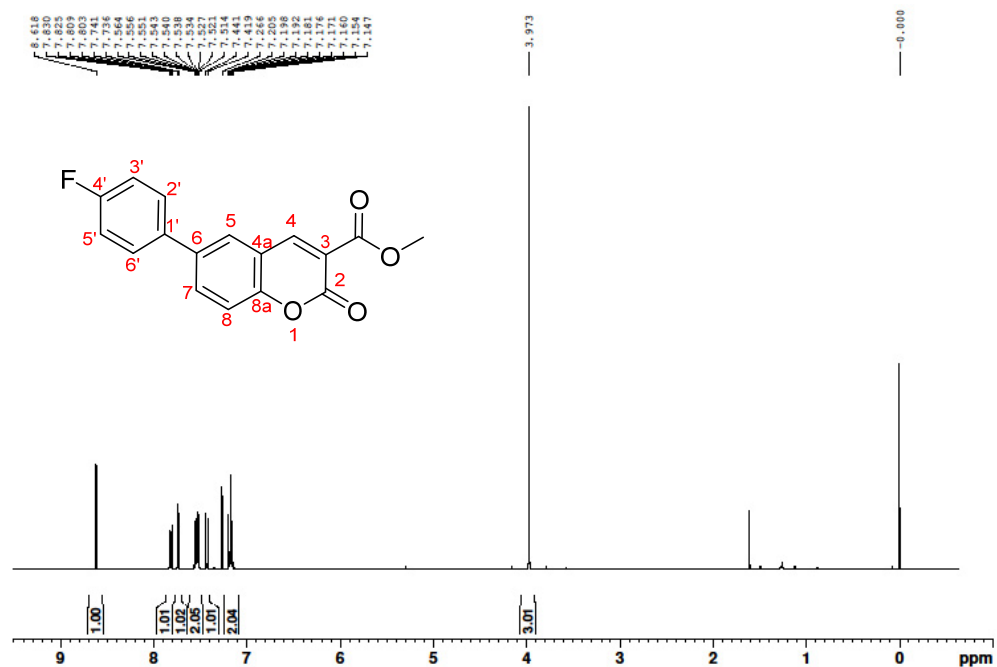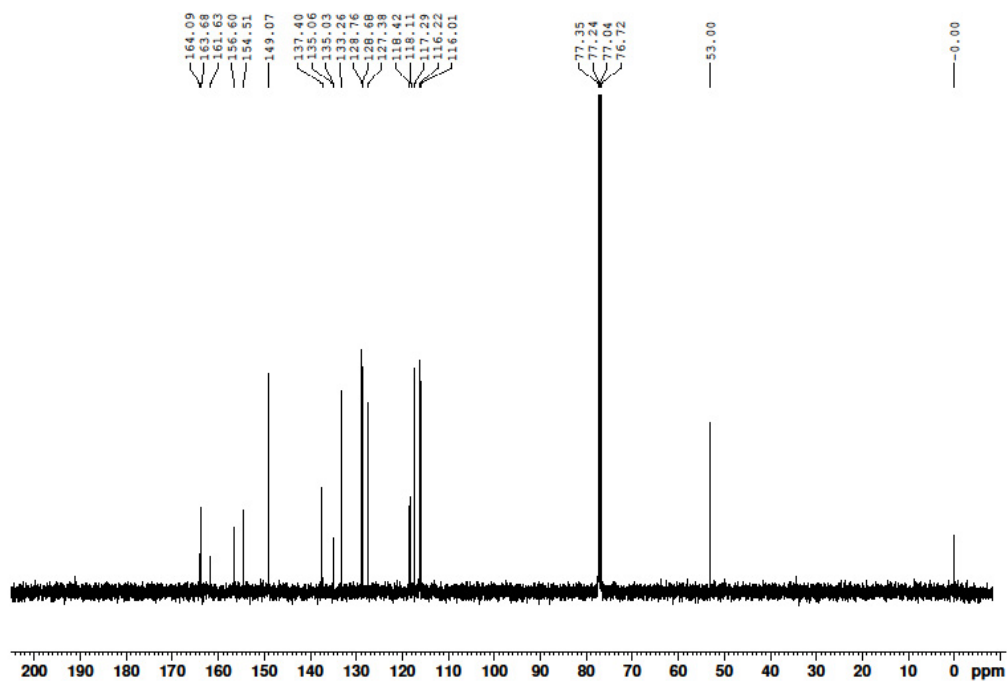

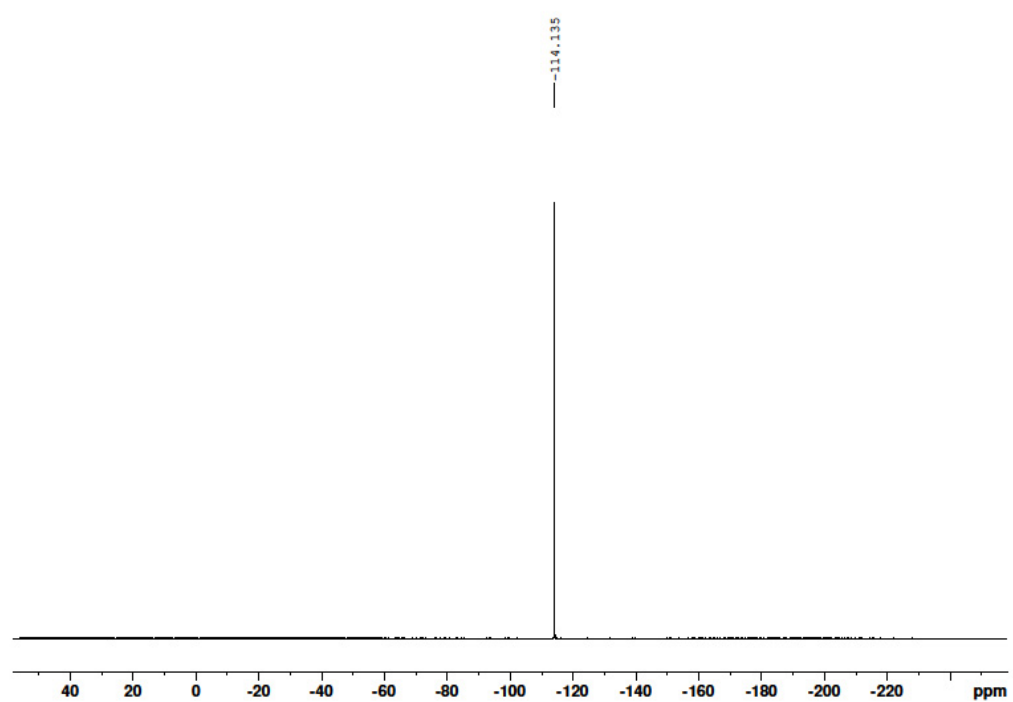

$^1\text{H}$  and  $^{13}\text{C}$  NMR spectra of compound **10e**

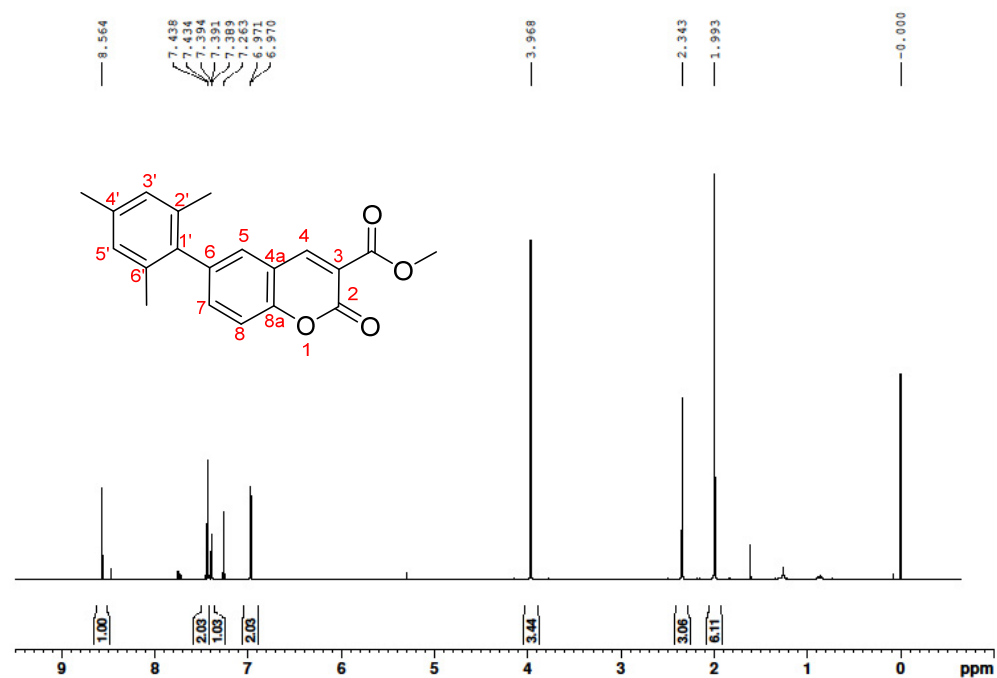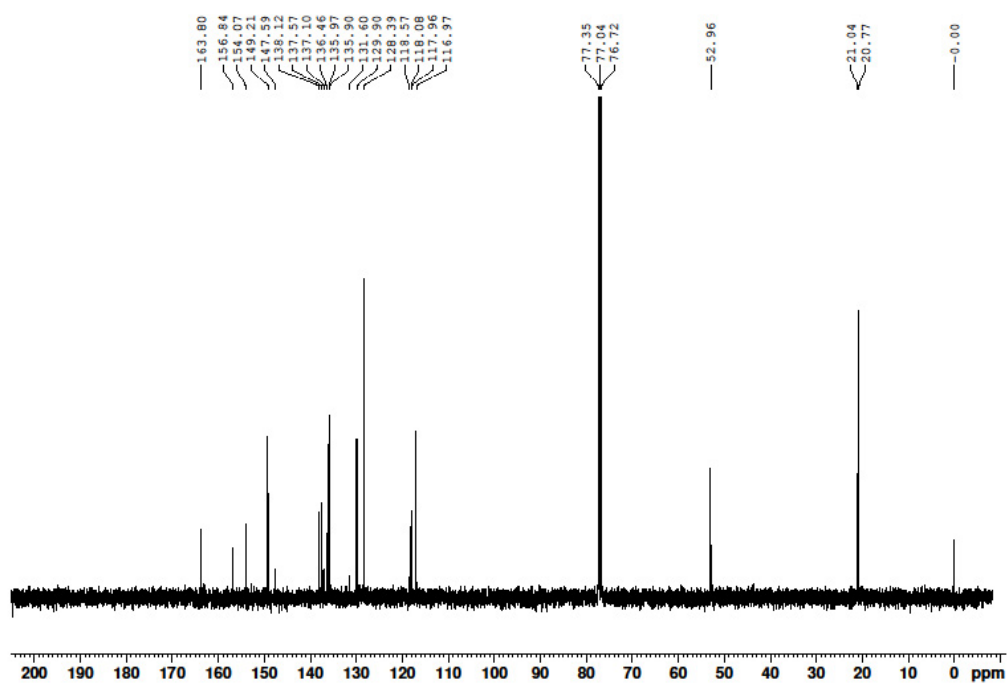

$^1\text{H}$ ,  $^{13}\text{C}$  and  $^{31}\text{P}$  NMR spectra of compound **11a**

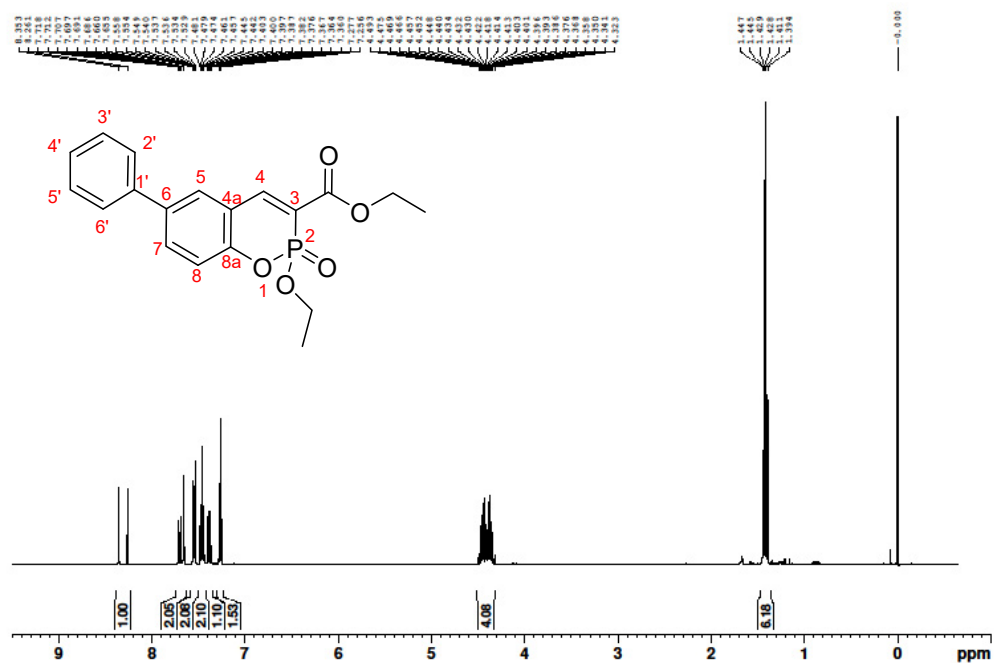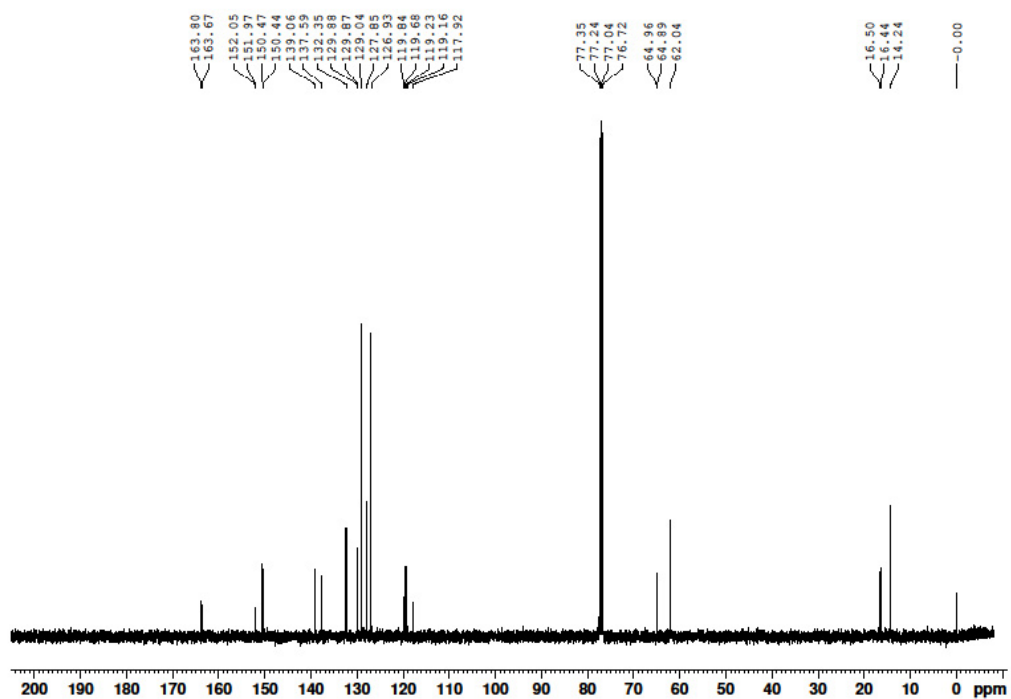



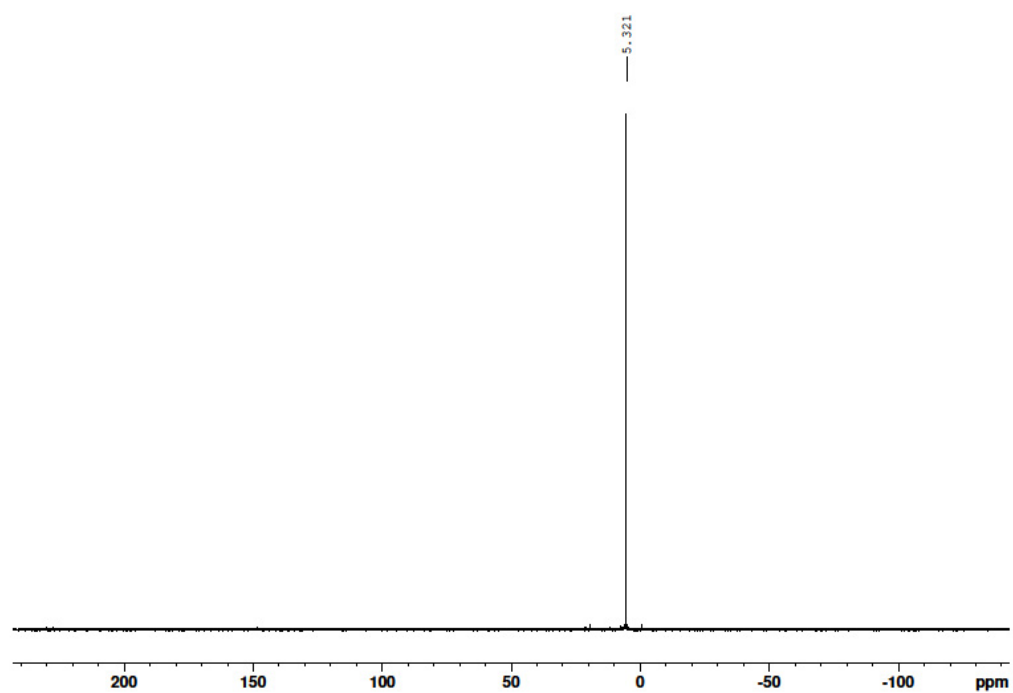

$^1\text{H}$ ,  $^{13}\text{C}$  and  $^{31}\text{P}$  NMR spectra of compound **11b**

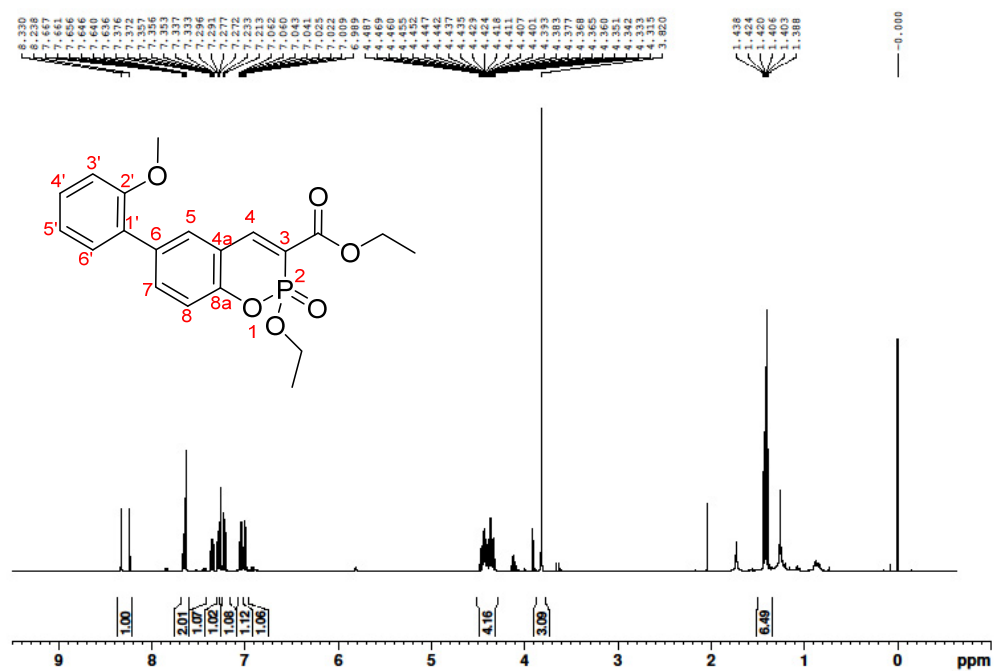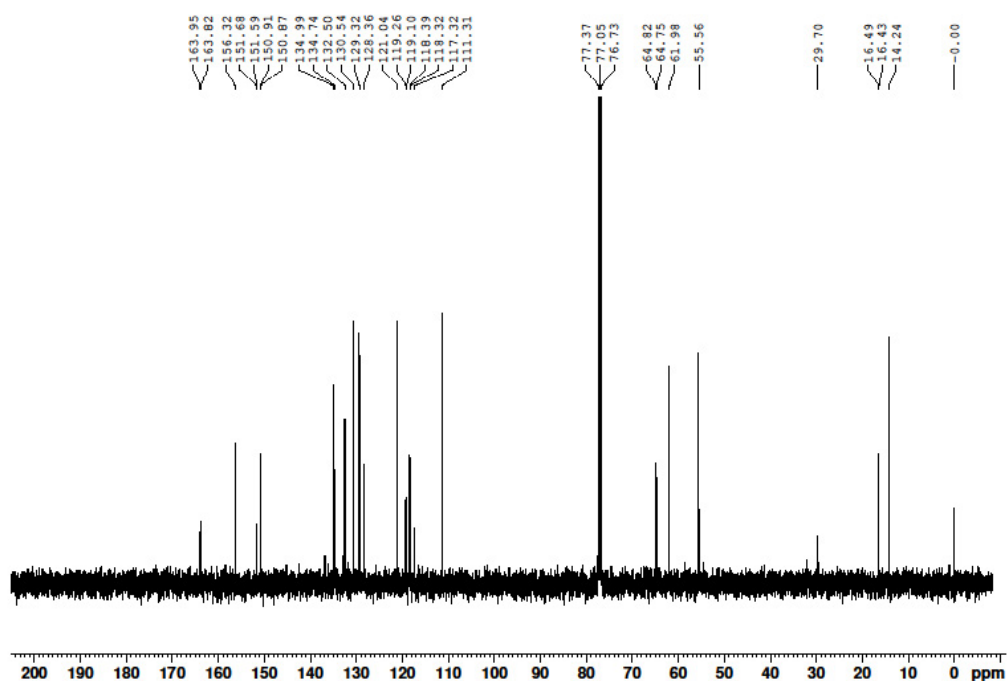

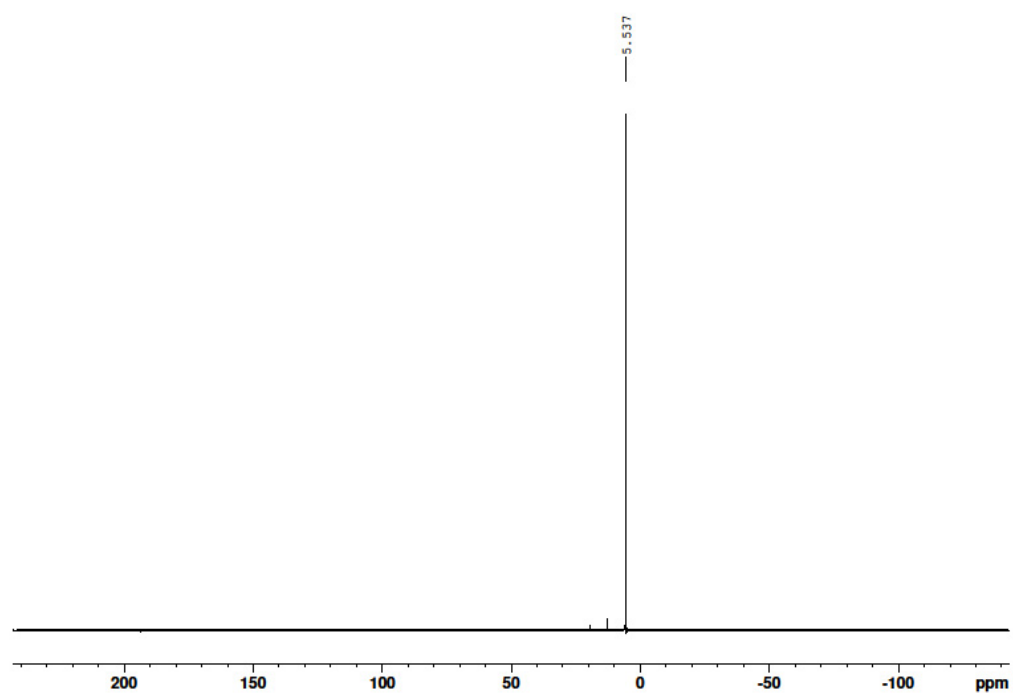

$^1\text{H}$ ,  $^{13}\text{C}$  and  $^{31}\text{P}$  NMR spectra of compound **11c**

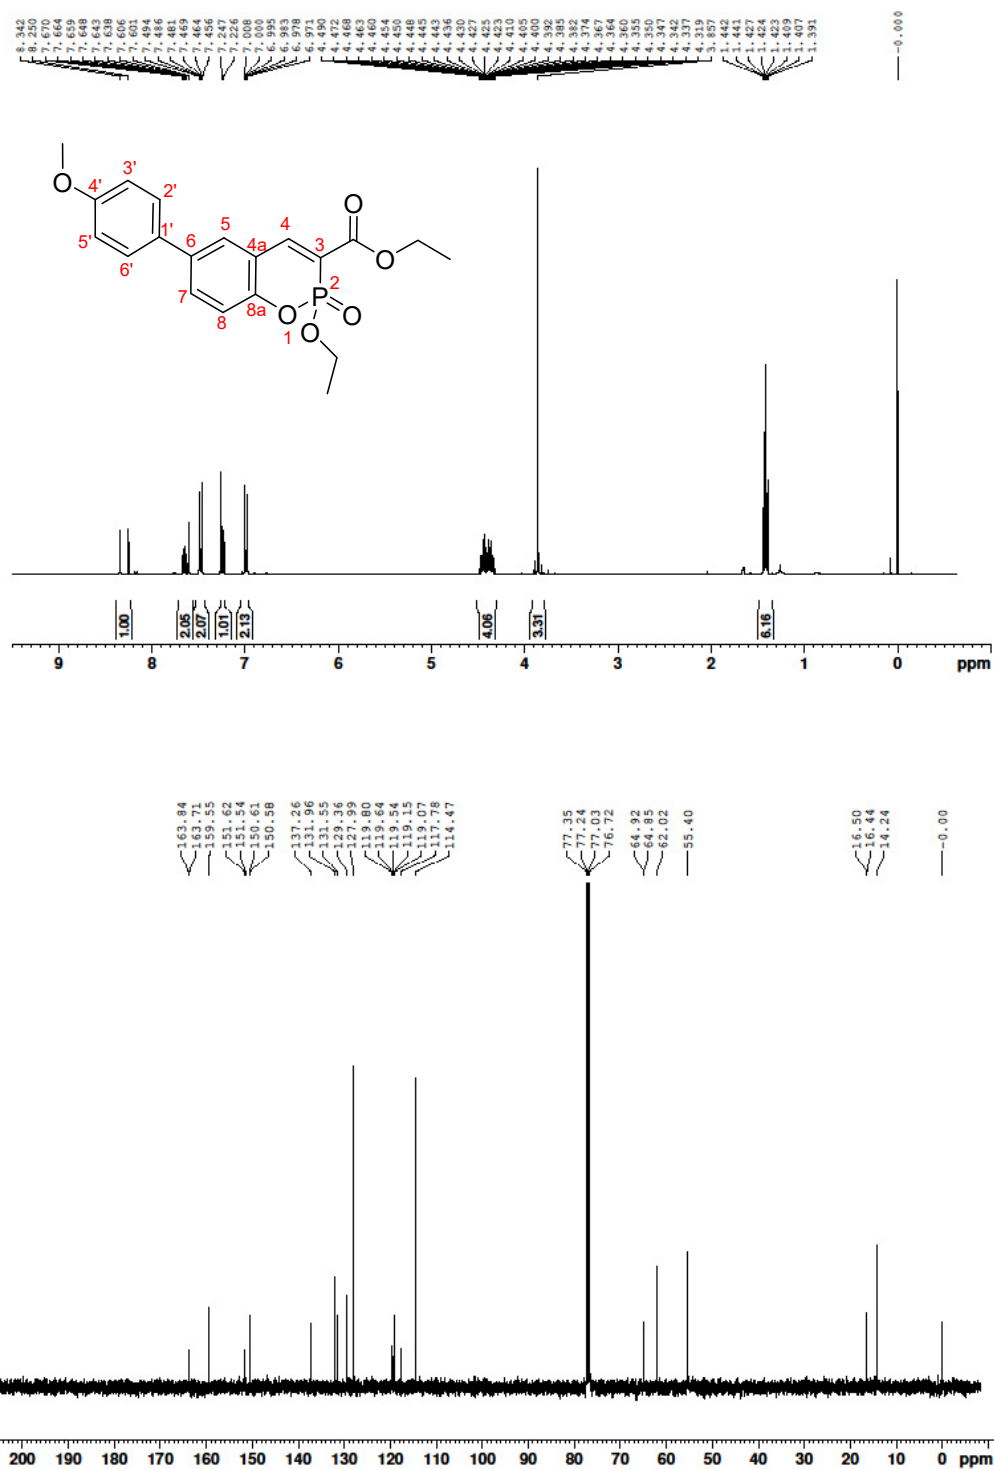

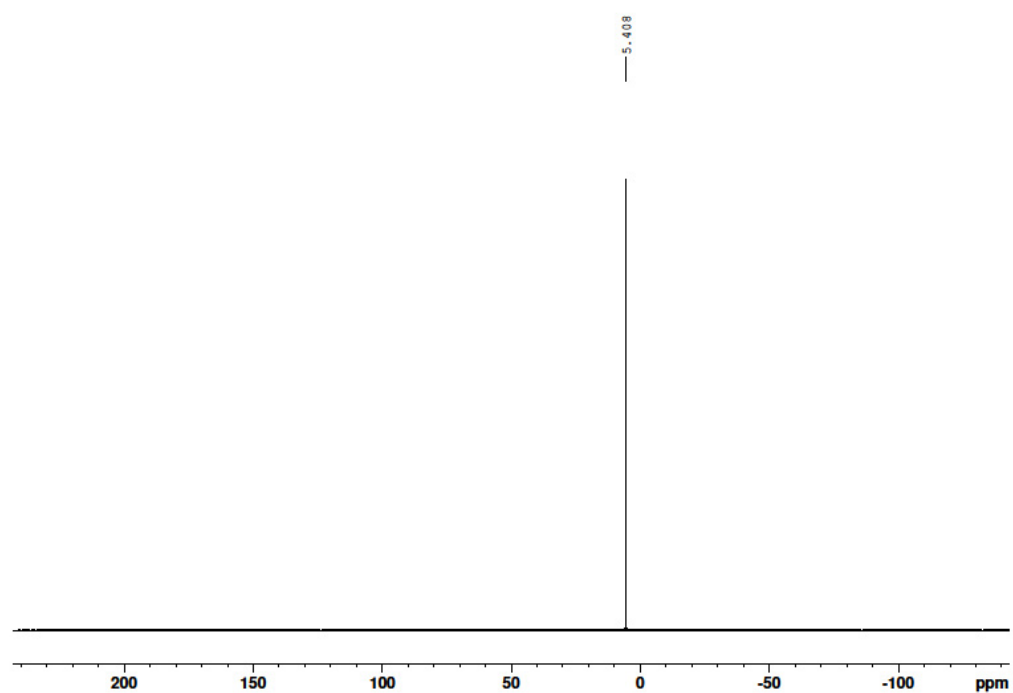

$^1\text{H}$ ,  $^{13}\text{C}$ ,  $^{19}\text{F}$  and  $^{31}\text{P}$  NMR spectra of compound **11d**

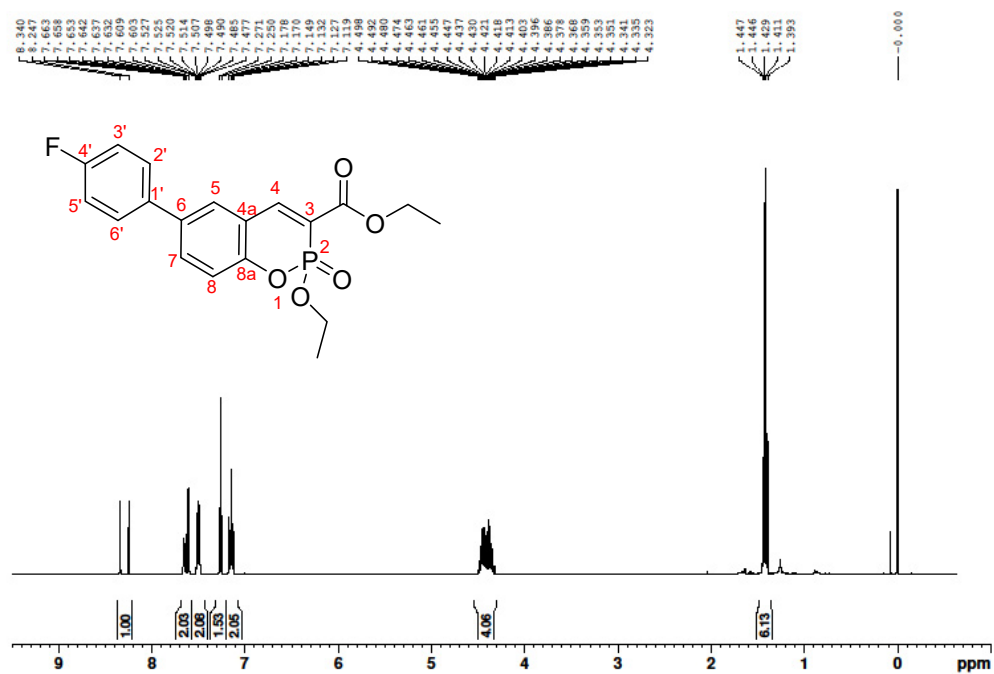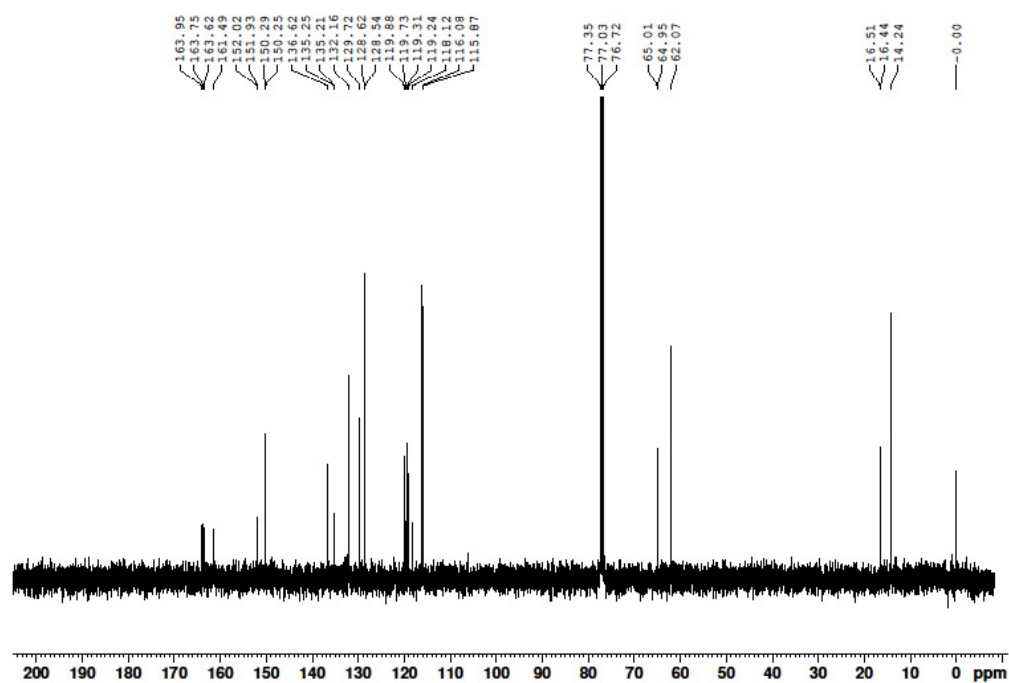

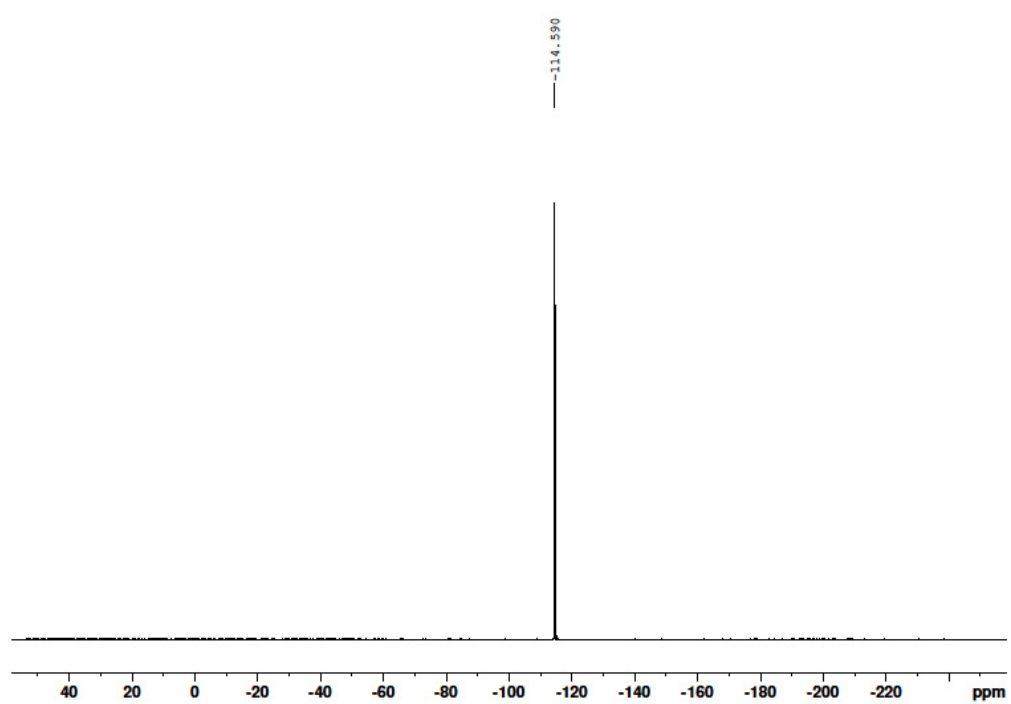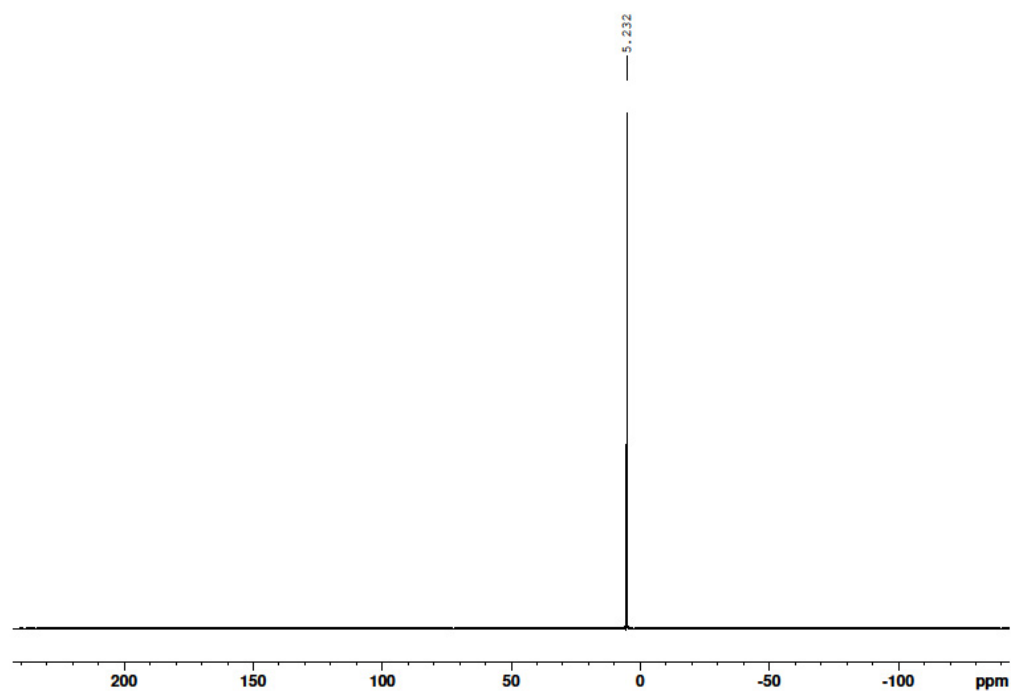

$^1\text{H}$ ,  $^{13}\text{C}$  and  $^{31}\text{P}$  NMR spectra of compound **12a**

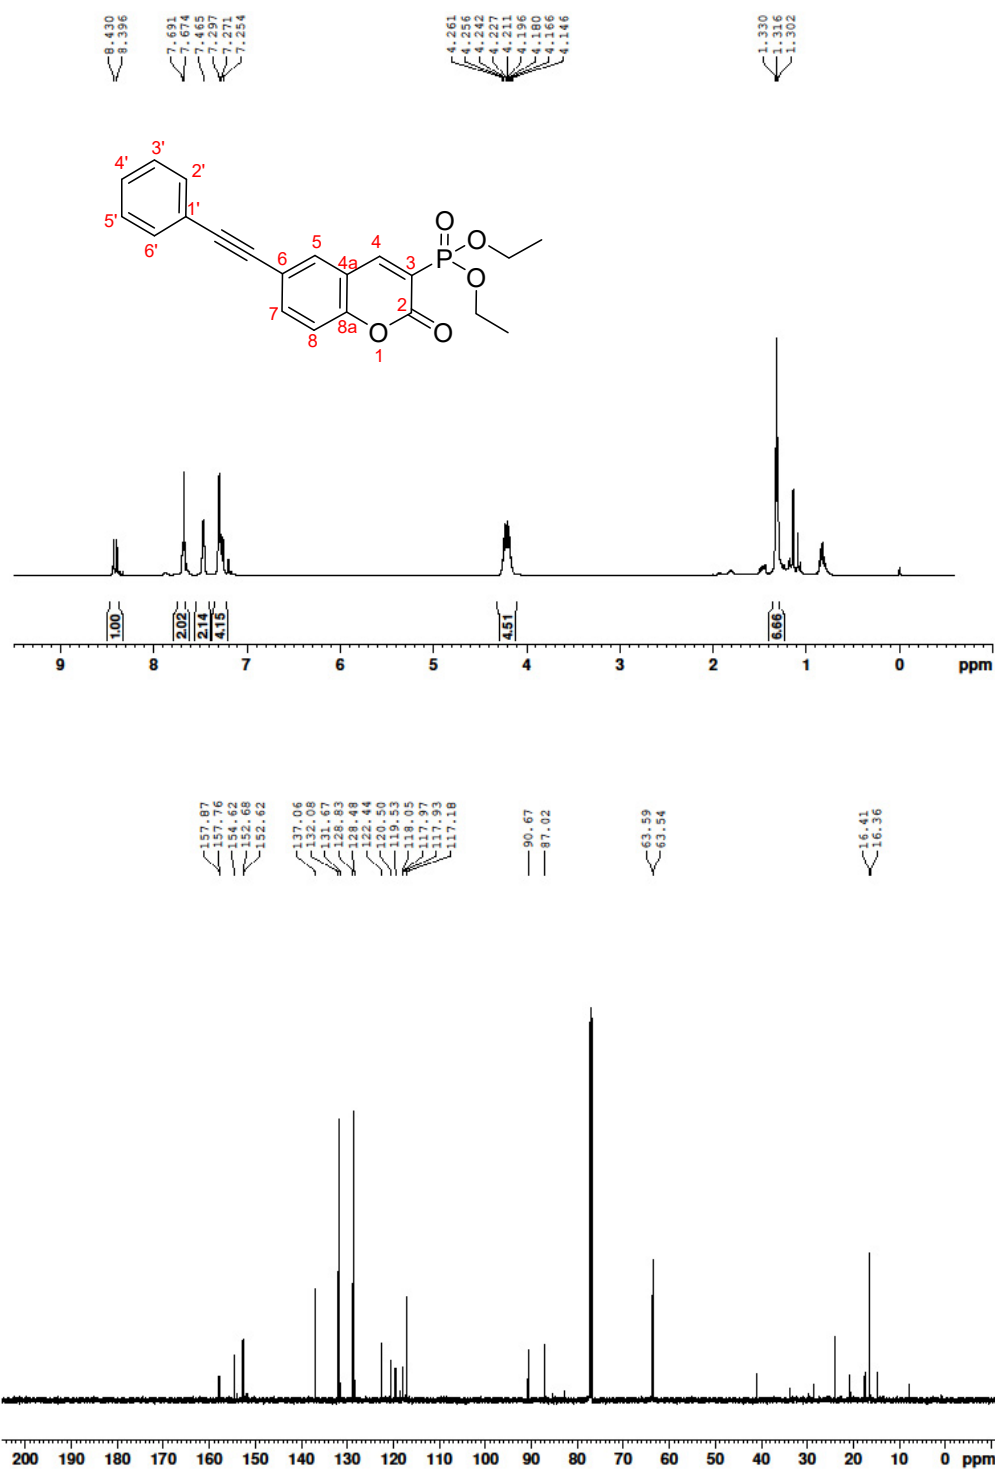



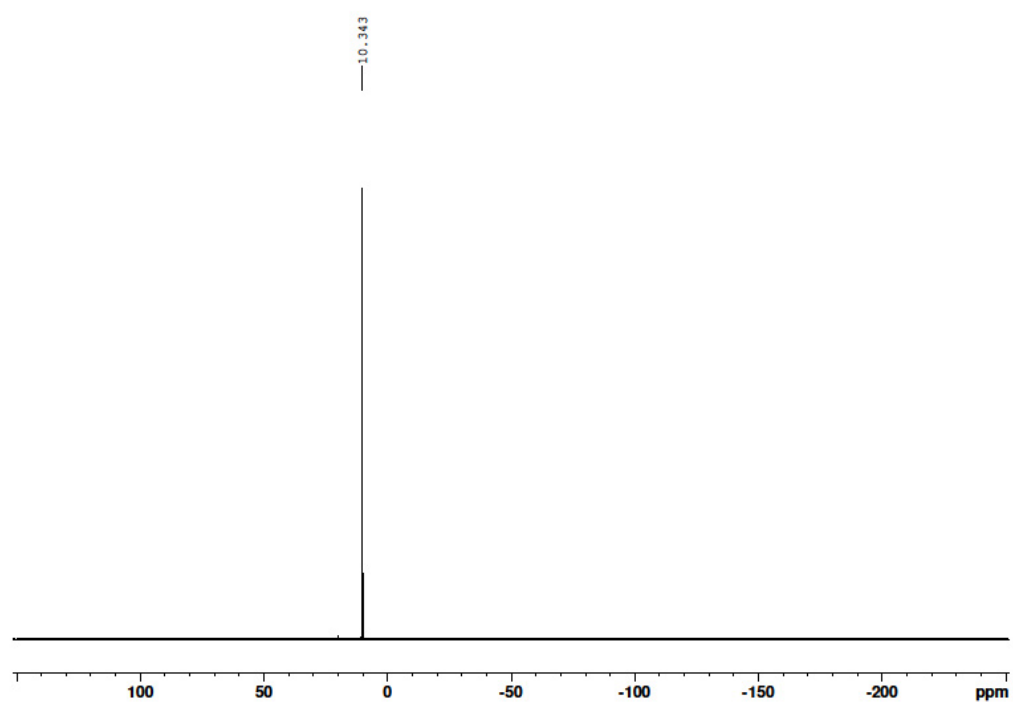

$^1\text{H}$  and  $^{13}\text{C}$  NMR spectra of compound **12b**

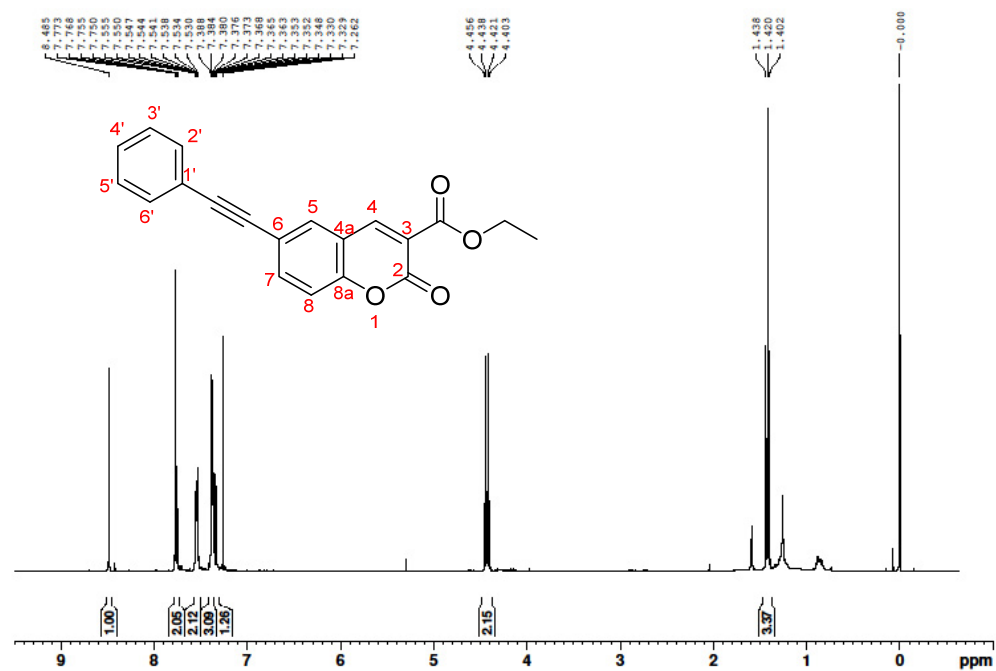

$^1\text{H}$ ,  $^{13}\text{C}$  and  $^{31}\text{P}$  NMR spectra of compound **12d**

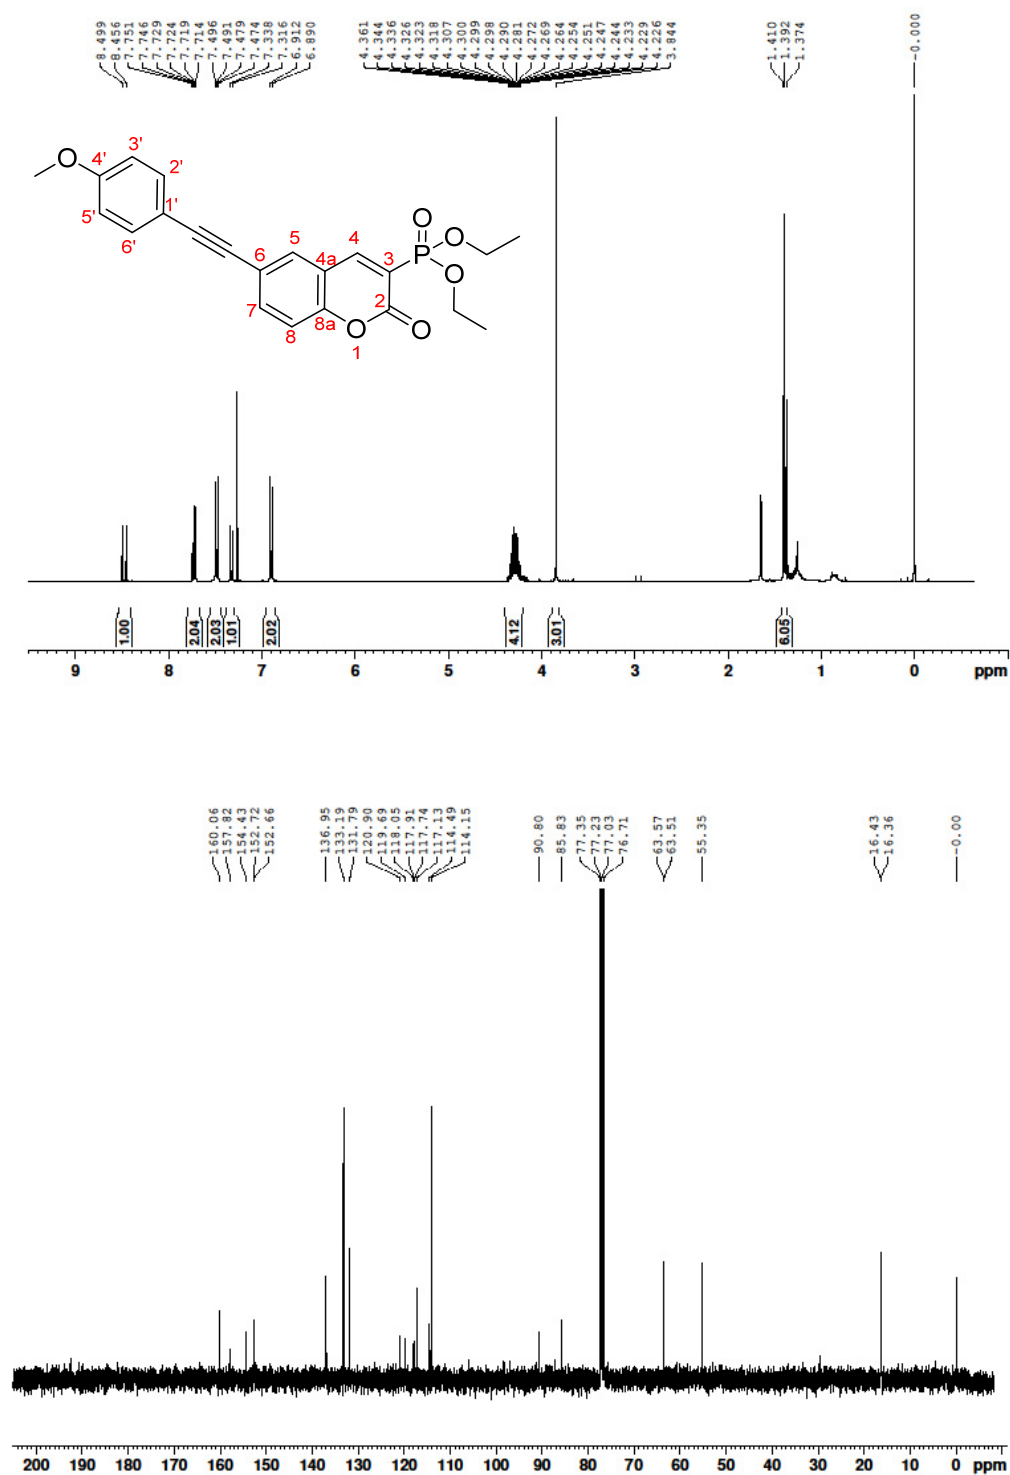

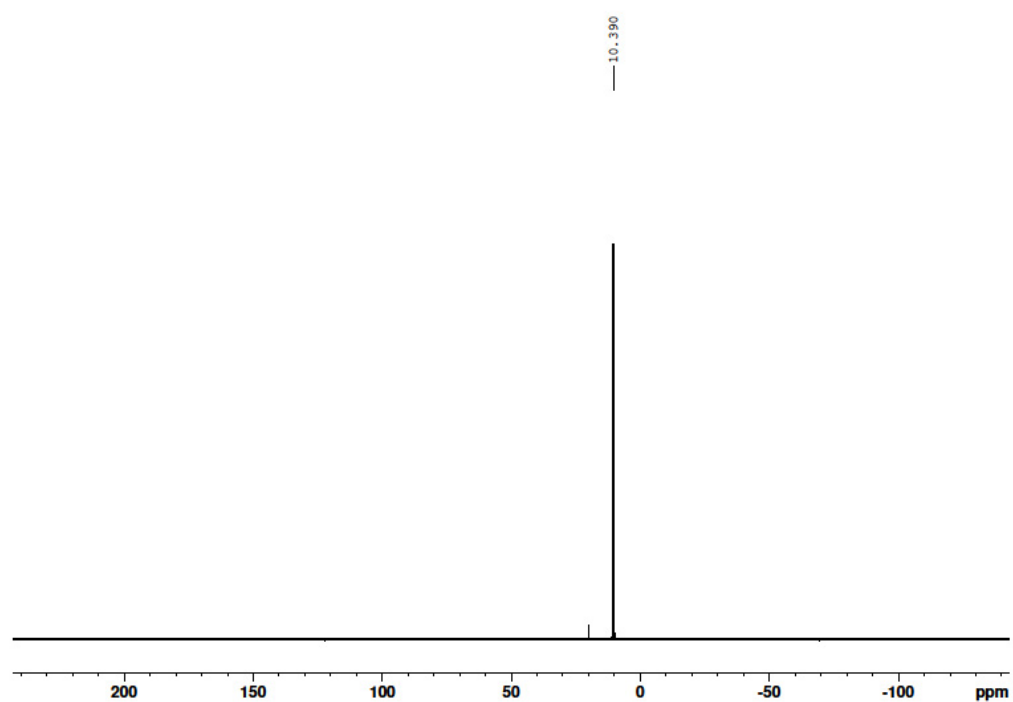

Supplement: s1 [file s1]
