# Supplementary material for: Efficient Synthesis of Fluorescent Coumarins and Phosphorous-Containing Coumarin-Type Heterocycles via Palladium Catalyzed Cross-Coupling Reactions
Source: MDPI journal article supplement (doi:10.3390/molecules27217649), 2022-11-07
Supplement: s1 [file s1]

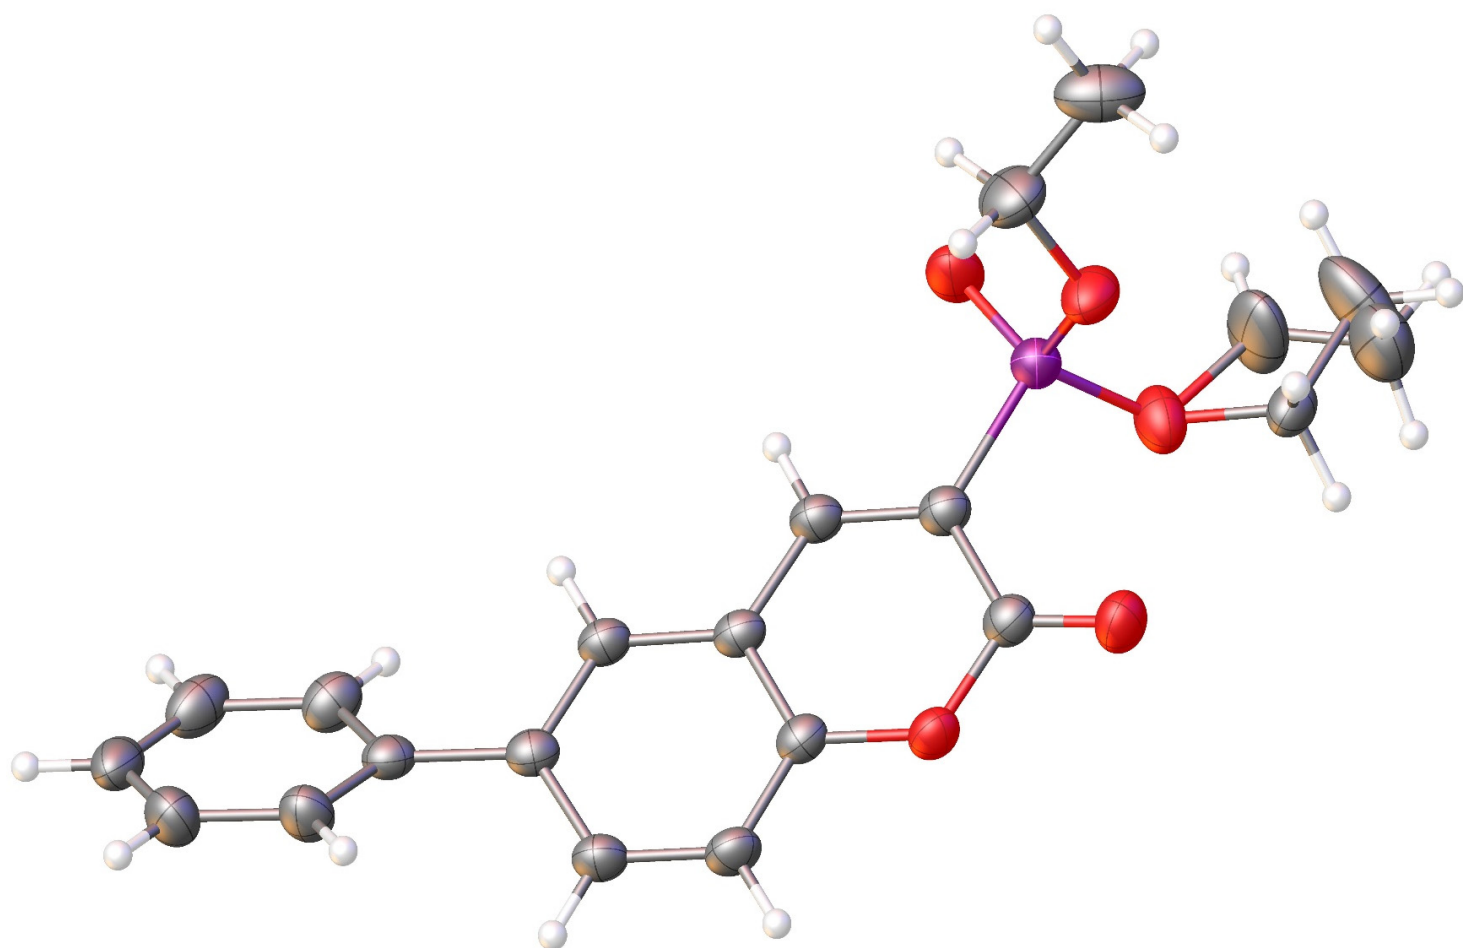

# Diethyl (2-oxo-6-phenyl-2H-chromen-3-yl)phosphonate

**Table S1** Crystal parameters of **3a**

| Crystal parameters |                                                  | Crystal parameters    |             | Crystal parameters                |                                                   |
|--------------------|--------------------------------------------------|-----------------------|-------------|-----------------------------------|---------------------------------------------------|
| Empirical formula  | C <sub>19</sub> H <sub>19</sub> O <sub>5</sub> P | c/Å                   | 14.9033(9)  | F(000)                            | 752.9                                             |
| Formula weight     | 358.31                                           | α/°                   | 90          | Crystal size/mm <sup>3</sup>      | 0.28 × 0.24 × 0.22                                |
| Temperature/K      | 133.00                                           | β/°                   | 90.726(2)   | Radiation                         | MoKα (λ = 0.71073)                                |
| Crystal system     | monoclinic                                       | γ/°                   | 90          | Goodness of fit on F <sup>2</sup> | 1.026                                             |
| Space group        | P 2 <sub>1</sub> /n                              | Volume/Å <sup>3</sup> | 1736.20(19) | Data/restraints/parameters        | 4155/44/248                                       |
| a/Å                | 13.6869(9)                                       | z                     | 4           | final R indices (I > 2σ(I))       | R <sub>1</sub> = 0.0390, wR <sub>2</sub> = 0.1052 |
| b/Å                | 8.5123(5)                                        | μ/mm <sup>-1</sup>    | 0.185       | R indices (all data)              | R <sub>1</sub> = 0.0438, wR <sub>2</sub> = 0.1092 |

**Table S2** Fractional Atomic Coordinates (×10<sup>4</sup>) and Equivalent Isotropic Displacement Parameters (Å<sup>2</sup>×10<sup>3</sup>) for **3a**. U<sub>eq</sub> is defined as 1/3 of of the trace of the orthogonalised U<sub>ij</sub> tensor

| Atom | x          | y           | z          | U(eq)     |
|------|------------|-------------|------------|-----------|
| P1   | 7040.7(3)  | 4040.7(4)   | 5145.4(3)  | 32.53(12) |
| O1   | 6337.5(7)  | -158.8(11)  | 6294.7(7)  | 32.2(2)   |
| O2   | 7770.0(7)  | 936.5(13)   | 6043.1(8)  | 41.1(3)   |
| O3   | 6368.9(8)  | 5178.5(13)  | 4736.3(8)  | 45.5(3)   |
| O4   | 7782.9(8)  | 3289.6(14)  | 4491.4(7)  | 42.6(3)   |
| O5   | 7705.0(8)  | 4732.7(13)  | 5920.3(8)  | 43.0(3)   |
| C1   | 6897.5(10) | 1072.6(15)  | 5978.8(9)  | 30.7(3)   |
| C2   | 6373.0(10) | 2421.2(15)  | 5598.2(9)  | 29.0(3)   |
| C3   | 5387.6(10) | 2468.9(15)  | 5597.9(9)  | 29.0(3)   |
| C4   | 4829.1(10) | 1214.7(14)  | 5981.3(8)  | 27.0(3)   |
| C5   | 5332.7(10) | -81.6(15)   | 6325.6(8)  | 27.8(3)   |
| C6   | 4841.7(10) | -1321.8(15) | 6716.8(9)  | 32.2(3)   |
| C7   | 3835.5(10) | -1253.3(15) | 6777.8(9)  | 31.0(3)   |
| C8   | 3299.0(10) | 44.1(14)    | 6452.5(8)  | 27.6(3)   |
| C9   | 3808.5(9)  | 1256.6(15)  | 6047.9(8)  | 27.8(3)   |
| C10  | 2223.4(10) | 142.8(14)   | 6550.3(9)  | 29.1(3)   |
| C11  | 1760.7(11) | -452.7(17)  | 7303.8(11) | 37.8(3)   |
| C12  | 755.1(12)  | -345.2(19)  | 7391.3(13) | 45.6(4)   |
| C13  | 191.5(11)  | 352.5(18)   | 6727.9(12) | 42.6(4)   |
| C14  | 638.8(12)  | 959.7(19)   | 5983.5(12) | 44.2(4)   |
| C15  | 1646.8(11) | 865.9(17)   | 5891.8(10) | 37.8(3)   |
| C16  | 7330.4(14) | 5918(2)     | 6527.6(13) | 51.3(4)   |
| C17  | 8129.3(16) | 7003(2)     | 6784.5(13) | 57.3(5)   |
| C18A | 8812.3(13) | 3272(2)     | 4551.8(13) | 34.4(5)   |
| C19A | 9235(4)    | 4457(7)     | 3944(4)    | 80.9(17)  |

|      |          |          |          |       |
|------|----------|----------|----------|-------|
| C18B | 8445(7)  | 4221(11) | 3967(7)  | 70(3) |
| C19B | 9407(14) | 3960(20) | 4055(16) | 72(4) |

**Table S3** Anisotropic Displacement Parameters ( $\text{\AA}^2 \times 10^3$ ) for **3a**. The Anisotropic displacement factor exponent takes the form:  $-2\pi^2[h^2a^{*2}U_{11}+2hka^*b^*U_{12}+...]$ .

| Atom | $U_{11}$  | $U_{22}$  | $U_{33}$ | $U_{12}$ | $U_{13}$ | $U_{23}$ |
|------|-----------|-----------|----------|----------|----------|----------|
| P1   | 30.11(19) | 27.27(19) | 40.3(2)  | 0.67(12) | 3.36(14) | 2.93(13) |
| O1   | 30.9(5)   | 28.1(5)   | 37.5(5)  | 6.2(4)   | 1.9(4)   | 5.3(4)   |
| O2   | 31.5(5)   | 40.4(6)   | 51.5(6)  | 6.8(4)   | 3.0(4)   | 6.8(5)   |
| O3   | 38.2(6)   | 34.8(6)   | 63.5(7)  | 2.1(4)   | 3.7(5)   | 19.1(5)  |
| O4   | 34.5(5)   | 50.1(6)   | 43.4(6)  | -5.0(5)  | 8.2(4)   | -6.3(5)  |
| O5   | 38.4(6)   | 36.2(6)   | 54.3(7)  | 2.4(4)   | -0.1(5)  | -13.9(5) |
| C1   | 33.1(7)   | 28.7(6)   | 30.4(6)  | 3.7(5)   | 3.5(5)   | 0.7(5)   |
| C2   | 32.4(6)   | 26.2(6)   | 28.4(6)  | 2.2(5)   | 1.7(5)   | 1.4(5)   |
| C3   | 33.9(6)   | 24.6(6)   | 28.4(6)  | 2.6(5)   | 0.6(5)   | 2.2(5)   |
| C4   | 32.9(6)   | 23.6(6)   | 24.5(6)  | 3.4(5)   | 1.1(5)   | 0.9(4)   |
| C5   | 30.8(6)   | 25.7(6)   | 26.7(6)  | 4.6(5)   | 0.9(5)   | -1.2(5)  |
| C6   | 36.7(7)   | 24.4(6)   | 35.4(7)  | 5.4(5)   | 0.0(5)   | 4.8(5)   |
| C7   | 36.0(7)   | 23.9(6)   | 33.2(7)  | 0.5(5)   | 0.3(5)   | 3.3(5)   |
| C8   | 32.8(6)   | 23.9(6)   | 26.1(6)  | 0.8(5)   | -1.1(5)  | -1.4(4)  |
| C9   | 32.4(6)   | 23.9(6)   | 27.0(6)  | 3.7(5)   | -0.8(5)  | 1.7(4)   |
| C10  | 32.5(6)   | 21.6(6)   | 33.0(7)  | 0.0(5)   | -1.9(5)  | -2.3(5)  |
| C11  | 34.1(7)   | 34.4(7)   | 45.0(8)  | -1.2(6)  | 0.6(6)   | 10.0(6)  |
| C12  | 36.5(8)   | 39.2(8)   | 61.3(10) | -3.5(6)  | 8.2(7)   | 8.0(7)   |
| C13  | 30.1(7)   | 30.9(7)   | 66.6(10) | 1.3(5)   | -1.9(7)  | -10.0(7) |
| C14  | 41.4(8)   | 41.2(8)   | 49.8(9)  | 11.2(6)  | -11.3(7) | -6.1(7)  |
| C15  | 40.0(8)   | 37.6(7)   | 35.8(7)  | 7.5(6)   | -3.8(6)  | -0.3(6)  |
| C16  | 57.1(10)  | 40.3(8)   | 56.7(10) | 5.1(7)   | 10.4(8)  | -12.8(7) |
| C17  | 89.6(14)  | 35.2(8)   | 46.9(9)  | -2.3(8)  | -12.9(9) | -1.8(7)  |
| C18A | 28.6(9)   | 33.2(10)  | 41.3(10) | 5.5(7)   | -1.4(7)  | -5.9(7)  |

## 1. Experimental

The data set was collected using a Bruker D8 Venture diffractometer with a microfocus sealed tube and a Photon II detector. Monochromated  $\text{MoK}\alpha$  radiation ( $\lambda = 0.71073 \text{ \AA}$ ) was used. Data were collected at 133(2) K and corrected for absorption effects using the multi-scan method. The structure was solved by direct methods using SHELXT [1] and was refined by full matrix least squares calculations on  $F^2$  (SHELXL2018 [2]) in the graphical user interface Shelxle [3].

- [1] Sheldrick, G. M. (2015). Acta Cryst. A71, 3-8.
- [2] Sheldrick, G. M. (2015). Acta Cryst. C71, 3-8.
- [3] Hübschle, C. B., Sheldrick, G. M., Dittrich, B. (2011). J. Appl. Crystallogr., 44, 12811284.

## 2. Refinement

All non H-atoms were located in the electron density maps and refined anisotropically. C-bound H atoms were placed in positions of optimized geometry and treated as riding atoms. Their isotropic displacement parameters were coupled to the corresponding carrier atoms by a factor of 1.2 (CH, CH<sub>2</sub>) or 1.5 (CH<sub>3</sub>). Disorder: The ethoxy-group on O5 was split over two positions. Its occupancy factors refined to 0.775 for the major compound.

## 3. Crystal Data

**Crystal Data** for C<sub>19</sub>H<sub>19</sub>O<sub>5</sub>P (M = 358.333g/mol): monoclinic, space group P2<sub>1</sub>/n (no. 14), a = 13.6869(9) Å, b = 8.5123(5) Å, c = 14.9033(9) Å, α = 90°, β = 90.726(2)°, γ = 90° V = 1736.20(19) Å<sup>3</sup>, Z = 4, T = 133.00 K, μ(MoKα) = 0.185 mm<sup>-1</sup>, D<sub>calc</sub> = 1.371 g/cm<sup>3</sup>, 26402 reflections measured (4.06° ≤ 2θ ≤ 55.84°), 4155 unique (R<sub>int</sub> = 0.0591, R<sub>sigma</sub> = 0.0405) which were used in all calculations. The final R<sub>1</sub> was 0.0393 (I > 2σ(I)) and wR<sub>2</sub> was 0.1111 (all data).
